# Supplementary material for: Ln3@C80+ (Ln = lanthanide): a new class of stable metallofullerene cations with multicenter metal–metal bonding in the sub-nanometer confined space
Source: Royal Society of Chemistry journal article supplement (doi:10.1039/d2qi00051b), 2022-01-01
Supplement: d2qi00051b1.pdf [file d2qi00051b1.pdf]

$\text{Ln}_3@C_{80}^+$  (Ln = lanthanide): a new class of stable  
metallofullerene cations with multicenter metal-metal  
bonding in sub-nanometer confined space

Yuhang Jiang, Zisheng Li, Yabei Wu, Zhiyong Wang,\*

Key Laboratory of Advanced Light Conversion Materials and Biophotonics,

Department of Chemistry, Renmin University of China, Beijing 100872, PR China

\*E-mail: zhiyongwang@ruc.edu.cn.

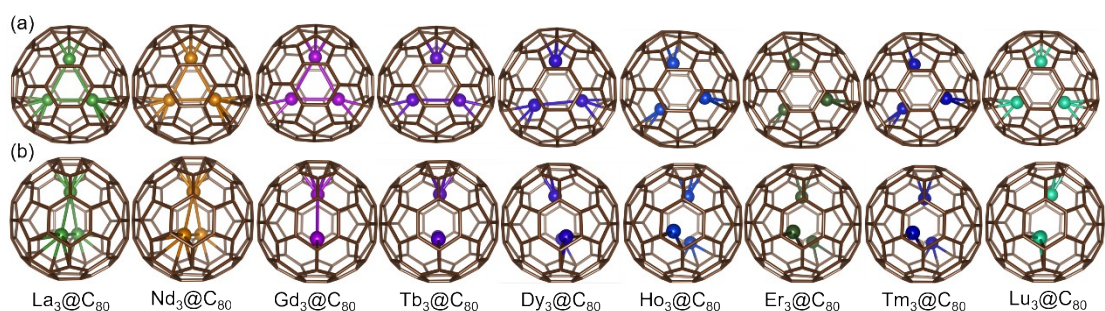

**Figure S1.** The front view (a) and side view (b) of the optimized geometric structures of  $\text{Ln}_3@I_h\text{-C}_{80}$  (Ln = La, Nd, Gd, Tb, Dy, Ho, Er, Tm, Lu) by using PBE0 functional.

**Table S1.** Relative energies ( $\Delta E$ , in kcal/mol) of  $\text{Ln}_3@C_{80}$  calculated at different theory level

| $\text{Ln}_3@C_{80}$                      | La                   |       | Nd    |       | Gd    |       | Tb    |       | Dy    |       | Ho    |       | Er    |       | Lu    |       |
|-------------------------------------------|----------------------|-------|-------|-------|-------|-------|-------|-------|-------|-------|-------|-------|-------|-------|-------|-------|
|                                           | (Cage spiral number) | PBE   | PBE0  |       |
| $\text{Ln}_3@I_h(31924)\text{-C}_{80}$    | 0.00                 | 0.00  | 0.00  | 0.00  | 0.00  | 0.00  | 0.00  | 0.00  | 0.00  | 0.00  | 0.00  | 0.00  | 0.00  | 0.00  | 0.00  | 0.00  |
| $\text{Ln}_3@D_{5h}(31923)\text{-C}_{80}$ | 15.07                | 17.37 | 14.66 | 16.45 | 14.44 | 13.74 | 13.58 | 13.94 | 13.22 | 14.02 | 13.31 | 14.21 | 13.39 | 14.23 | 12.76 | 16.88 |
| $\text{Ln}_3@C_{2v}(31922)\text{-C}_{80}$ | 17.85                | 21.81 | 13.80 | 14.11 | 16.30 | 16.16 | 16.80 | 17.83 | 17.79 | 19.50 | 19.21 | 21.19 | 20.53 | 22.62 | 23.22 | 29.21 |
| $\text{Ln}_3@C_{2v}(31920)\text{-C}_{80}$ | 22.02                | 24.64 | 20.94 | 21.40 | 25.96 | 26.35 | 27.05 | 28.65 | 28.71 | 31.04 | 30.76 | 33.35 | 32.78 | 35.51 | 37.42 | 44.13 |
| $\text{Ln}_3@C_I(28319)\text{-C}_{80}$    | 33.73                | 37.73 | 33.20 | 33.69 | 32.56 | 35.09 | 32.79 | 36.59 | 33.53 | 38.03 | 34.64 | 39.43 | 35.75 | 40.67 | 37.90 | 46.45 |
| $\text{Ln}_3@C_I(28324)\text{-C}_{80}$    | 32.29                | 38.64 | 31.60 | 33.46 | 33.95 | 35.50 | 34.35 | 37.10 | 35.29 | 38.72 | 36.62 | 40.29 | 37.93 | 41.73 | 40.79 | 48.43 |
| $\text{Ln}_3@C_I(28325)\text{-C}_{80}$    | 25.57                | 28.07 | 25.30 | 28.81 | 14.19 | 24.15 | 24.77 | 25.96 | 25.81 | 27.72 | 27.24 | 29.40 | 28.63 | 30.66 | 31.48 | 35.96 |
| $\text{Ln}_3@C_2(29591)\text{-C}_{80}$    | 30.28                | 48.73 | 38.03 | 30.95 | 30.74 | 30.67 | 31.05 | 32.03 | 31.84 | 33.33 | 33.09 | 34.60 | 34.34 | 35.74 | 36.92 | 41.59 |
| $\text{Ln}_3@C_I(31876)\text{-C}_{80}$    | 30.28                | 36.84 | 13.80 | 32.05 | 30.25 | 32.66 | 30.24 | 33.79 | 30.93 | 35.14 | 32.02 | 36.45 | 33.13 | 37.65 | 35.50 | 43.84 |

**Table S2.** Relative energies ( $\Delta E$ , in kcal/mol) and HOMO-LUMO gap of the molecules (H-L Gap, in eV) (6-31G\* and ECP58MWB basis sets are used for C and Tm atom, respectively)

| $\text{Tm}_3\text{C}_{80}$<br>(spiral number)       | PBE0         |                                                                         | PBE        |                                                                         |
|-----------------------------------------------------|--------------|-------------------------------------------------------------------------|------------|-------------------------------------------------------------------------|
|                                                     | $\Delta E$ , | H-L Gap                                                                 | $\Delta E$ | H-L Gap                                                                 |
| $\text{Tm}_3@I_h(31924)\text{-C}_{80}$              | 0.00         | 1.50 <sup><math>\alpha</math></sup> /2.70 <sup><math>\beta</math></sup> | 0.00       | 0.28 <sup><math>\alpha</math></sup> /1.43 <sup><math>\beta</math></sup> |
| $\text{Tm}_3@D_{5h}(31923)\text{-C}_{80}$           | 14.08        | 0.28 <sup><math>\alpha</math></sup> /1.43 <sup><math>\beta</math></sup> | 13.32      | 0.28 <sup><math>\alpha</math></sup> /1.38 <sup><math>\beta</math></sup> |
| $\text{Tm}_3@C_{2v}(31922)\text{-C}_{80}$           | 23.89        | 1.41 <sup><math>\alpha</math></sup> /1.59 <sup><math>\beta</math></sup> | 21.65      | 0.47 <sup><math>\alpha</math></sup> /0.59 <sup><math>\beta</math></sup> |
| $\text{Tm}_3@C_{2v}(31920)\text{-C}_{80}$           | 37.40        | 0.95 <sup><math>\alpha</math></sup> /1.54 <sup><math>\beta</math></sup> | 34.54      | 0.09 <sup><math>\alpha</math></sup> /0.52 <sup><math>\beta</math></sup> |
| $\text{Tm}_3@C_I(28319)\text{-C}_{80}$              | 41.63        | 1.19 <sup><math>\alpha</math></sup> /1.81 <sup><math>\beta</math></sup> | 36.56      | 0.32 <sup><math>\alpha</math></sup> /0.78 <sup><math>\beta</math></sup> |
| $\text{Tm}_3@C_I(28324)\text{-C}_{80}$              | 42.91        | 1.56 <sup><math>\alpha</math></sup> /1.44 <sup><math>\beta</math></sup> | 38.98      | 0.52 <sup><math>\alpha</math></sup> /0.40 <sup><math>\beta</math></sup> |
| $\text{Tm}_3@C_I(28325)\text{-C}_{80}$              | 31.18        | 1.34 <sup><math>\alpha</math></sup> /2.30 <sup><math>\beta</math></sup> | 29.62      | 0.27 <sup><math>\alpha</math></sup> /1.16 <sup><math>\beta</math></sup> |
| $\text{Tm}_3@C_2(29591)\text{-C}_{80}$              | 36.42        | 1.40 <sup><math>\alpha</math></sup> /2.49 <sup><math>\beta</math></sup> | 35.20      | 0.24 <sup><math>\alpha</math></sup> /1.38 <sup><math>\beta</math></sup> |
| $\text{Tm}_3@C_I(31876)\text{-C}_{80}$              | 38.68        | 1.60 <sup><math>\alpha</math></sup> /1.25 <sup><math>\beta</math></sup> | 34.04      | 0.59 <sup><math>\alpha</math></sup> /0.30 <sup><math>\beta</math></sup> |
| $\text{Tm}_3\text{C}_2@C_2(22010)\text{-C}_{78}$    | 75.03        | 1.93 <sup><math>\alpha</math></sup> /2.49 <sup><math>\beta</math></sup> | 69.78      | 0.55 <sup><math>\alpha</math></sup> /1.23 <sup><math>\beta</math></sup> |
| $\text{Tm}_3\text{C}_2@C_{2v}(24107)\text{-C}_{78}$ | 96.77        | 1.64 <sup><math>\alpha</math></sup> /1.21 <sup><math>\beta</math></sup> | 83.02      | 0.66 <sup><math>\alpha</math></sup> /0.19 <sup><math>\beta</math></sup> |
| $\text{Tm}_3\text{C}_2@C_I(21975)\text{-C}_{78}$    | 96.77        | 1.43 <sup><math>\alpha</math></sup> /1.57 <sup><math>\beta</math></sup> | 86.88      | 0.43 <sup><math>\alpha</math></sup> /1.17 <sup><math>\beta</math></sup> |
| $\text{Tm}_3\text{C}_2@C_{2v}(24088)\text{-C}_{78}$ | 100.56       | 1.77 <sup><math>\alpha</math></sup> /2.01 <sup><math>\beta</math></sup> | 92.33      | 0.35 <sup><math>\alpha</math></sup> /0.92 <sup><math>\beta</math></sup> |
| $\text{Tm}_3\text{C}_2@D_{3h}(24109)\text{-C}_{78}$ | 111.09       | 1.92 <sup><math>\alpha</math></sup> /2.30 <sup><math>\beta</math></sup> | 100.36     | 0.29 <sup><math>\alpha</math></sup> /0.95 <sup><math>\beta</math></sup> |

**Table S3.** Calculated relative energies ( $\Delta E$ , in kcal/mol) of  $\text{Ln}_3@C_{80}$  with different spin multiplicities by using PBE0 functional

| $\text{Ln}_3@C_{80}$ | Doublet | Quartet |
|----------------------|---------|---------|
| La                   | 0       | 7.81    |
| Nd                   | 0       | 1.36    |
| Gd                   | 0       | 10.70   |
| Tb                   | 0       | 13.45   |
| Dy                   | 0       | 15.29   |
| Ho                   | 0       | 17.28   |
| Er                   | 0       | 20.24   |
| Tm                   | 0       | 22.62   |
| Lu                   | 0       | 29.76   |

**Table S4.** Calculated Ln-Ln bond length (in Å), the Mayer bond order of the metal moiety in  $\text{Ln}_3@I_h-C_{80}^+$  and the ionization energies (IP, in eV) of  $\text{Ln}_3@I_h-C_{80}$  by using PBE functional

| $\text{Ln}_3@C_{80}$ | Ln-Ln |       |       |         | Mayer bond order |       |       |               | IP   |
|----------------------|-------|-------|-------|---------|------------------|-------|-------|---------------|------|
|                      | 1     | 2     | 3     | average | 1                | 2     | 3     | $\text{Ln}_3$ |      |
| La                   | 3.427 | 3.427 | 3.428 | 3.427   | 1.678            | 1.677 | 1.677 | 5.032         | 5.56 |
| Nd                   | 3.473 | 3.480 | 3.480 | 3.478   | 1.583            | 1.586 | 1.582 | 4.751         | 5.34 |
| Gd                   | 3.506 | 3.513 | 3.474 | 3.498   | 1.701            | 1.632 | 1.609 | 4.942         | 5.34 |

|    |       |       |       |       |       |       |       |       |      |
|----|-------|-------|-------|-------|-------|-------|-------|-------|------|
| Tb | 3.509 | 3.510 | 3.501 | 3.507 | 1.627 | 1.607 | 1.612 | 4.846 | 5.34 |
| Dy | 3.507 | 3.512 | 3.486 | 3.502 | 1.629 | 1.707 | 1.568 | 4.904 | 5.53 |
| Ho | 3.514 | 3.518 | 3.513 | 3.515 | 1.744 | 1.737 | 1.745 | 5.226 | 5.42 |
| Er | 3.523 | 3.518 | 3.514 | 3.518 | 1.803 | 1.819 | 1.812 | 5.434 | 5.46 |
| Tm | 3.511 | 3.529 | 3.520 | 3.520 | 1.686 | 1.680 | 1.708 | 5.074 | 5.48 |
| Lu | 3.568 | 3.579 | 3.470 | 3.539 | 1.563 | 1.540 | 1.966 | 5.069 | 5.64 |

**Table S5.** Calculated Ln-Ln bond length (in Å), Mayer bond order of the metal moiety in  $\text{Ln}_3@C_{80}^+$ , ionization energies (IP, in eV) of  $\text{Ln}_3@C_{80}$  (PBE0 functional)

| $\text{Ln}_3@C_{80}^+$ | Ln-Ln |       |       |         | Mayer bond order |       |       |               | IP   |
|------------------------|-------|-------|-------|---------|------------------|-------|-------|---------------|------|
|                        | 1     | 2     | 3     | average | Ln(1)            | Ln(2) | Ln(3) | $\text{Ln}_3$ |      |
| La                     | 3.393 | 3.393 | 3.392 | 3.393   | 1.419            | 1.421 | 1.418 | 4.258         | 5.60 |
| Nd                     | 3.449 | 3.449 | 3.448 | 3.449   | 1.376            | 1.377 | 1.380 | 4.133         | 5.22 |
| Gd                     | 3.483 | 3.482 | 3.464 | 3.476   | 1.181            | 1.685 | 1.163 | 4.029         | 5.50 |
| Tb                     | 3.454 | 3.492 | 3.493 | 3.480   | 1.314            | 1.294 | 1.444 | 4.052         | 5.48 |
| Dy                     | 3.481 | 3.485 | 3.463 | 3.476   | 1.408            | 1.515 | 1.317 | 4.240         | 5.50 |
| Ho                     | 3.498 | 3.480 | 3.498 | 3.492   | 1.547            | 1.521 | 1.521 | 4.589         | 5.35 |
| Er                     | 3.497 | 3.491 | 3.507 | 3.498   | 1.600            | 1.592 | 1.618 | 4.810         | 5.43 |
| Tm                     | 3.498 | 3.495 | 3.490 | 3.494   | 1.492            | 1.463 | 1.492 | 4.447         | 5.50 |
| Lu                     | 3.542 | 3.550 | 3.456 | 3.516   | 1.352            | 1.332 | 1.821 | 4.505         | 5.65 |

**Table S6.** The calculated relative energies with different positions of encaged  $Tm_3$  cluster in  $Tm_3@I_h-C_{80}^+$ . ( $R_5$  and  $R_6$  mean that the metal atom is located toward a hexagon and a pentagon, respectively;  $B_{65}$ ,  $B_{66}$  and  $V_{665}$  mean that the metal atom is located toward a 6:5, 6:6 bond and a vertex fused by two hexagons and one pentagon, respectively.)

| Metal atom position           | $R_6R_6R_6$ | $B_{66}R_6R_6$ | $B_{56}B_{56}B_{56}$ | $R_6R_5R_5$ | $B_{66}B_{66}R_6$ | $V_{665}V_{665}V_{665}$ |
|-------------------------------|-------------|----------------|----------------------|-------------|-------------------|-------------------------|
| Relative energy (in kcal/mol) | 0.0         | 1.51           | 0.1                  | 1.56        | 0.01              | 0.59                    |

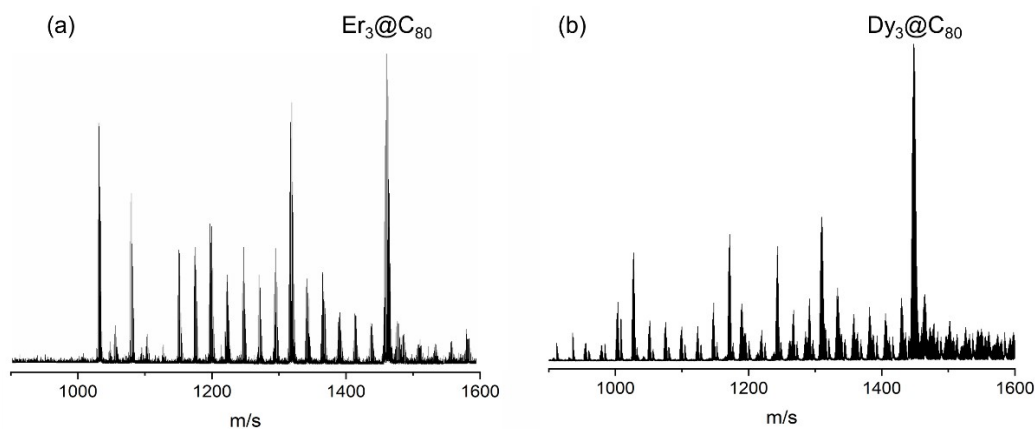

**Figure S2.** The LDI-TOF mass spectra of samples containing  $Er_3@C_{80}^+$  (a) and  $Dy_3@C_{80}^+$  (b). The samples were obtained by oxidation of the arc-discharge produced soot by  $AgSbF_6$ .

## Cartesian Coordinates (Angstrom) of DFT-Optimized Structures:

La<sub>3</sub>@C<sub>80</sub> PBE/6-31G\*~MWB46

|   |             |             |             |
|---|-------------|-------------|-------------|
| C | -3.42451900 | -1.75771100 | 1.42004100  |
| C | -2.57304400 | -1.95745900 | 2.54777600  |
| C | -2.17712300 | -0.85207500 | 3.38054600  |
| C | -0.84367100 | -1.10902000 | 3.85589200  |
| C | 0.08643300  | -0.04090900 | 4.06315300  |
| C | 1.47187400  | -0.30511100 | 3.81787900  |
| C | 2.34086000  | 0.71804800  | 3.29948400  |
| C | 3.33753100  | 0.09068800  | 2.44200900  |
| C | 3.96519800  | 0.78013400  | 1.33277000  |
| C | 4.26575000  | -0.05370500 | 0.15854600  |
| C | 4.06169400  | 0.46088500  | -1.21714800 |
| C | 3.54645100  | -0.65017300 | -2.00862300 |
| C | 2.61092800  | -0.48302300 | -3.09536800 |
| C | 1.71261500  | -1.56224000 | -3.39295300 |
| C | 0.38063100  | -1.29772200 | -3.86876200 |
| C | -0.49193600 | -2.31783100 | -3.35037300 |
| C | -1.84586600 | -2.02804100 | -3.01960900 |
| C | -2.41426000 | -2.75263000 | -1.90715600 |
| C | -3.36739000 | -2.09187700 | -1.04620100 |
| C | -3.18560700 | -2.61411000 | 0.28414100  |
| C | -3.90308500 | -0.42320400 | 1.17298600  |
| C | -4.12545300 | 0.08521800  | -0.15609500 |
| C | -3.82221300 | -0.74846000 | -1.29292200 |
| C | -3.31136700 | -0.07662400 | -2.44407600 |
| C | -2.34341100 | -0.71073700 | -3.30036200 |
| C | -1.46854400 | 0.30964800  | -3.81391500 |
| C | -0.08417300 | 0.04208100  | -4.06146000 |
| C | 0.84772500  | 1.10703600  | -3.85273100 |
| C | 2.17817500  | 0.84442200  | -3.37253300 |
| C | 2.59894800  | 1.96070700  | -2.53939900 |
| C | 3.54848000  | 1.81574900  | -1.45650600 |
| C | 3.30977100  | 2.67020000  | -0.28536900 |
| C | 3.51859500  | 2.16038800  | 1.09100700  |
| C | 2.45000700  | 2.72461800  | 1.90947100  |
| C | 1.85087700  | 2.02626300  | 3.02248200  |
| C | 0.48742600  | 2.32315000  | 3.35799300  |
| C | -0.38163200 | 1.29727300  | 3.87102900  |
| C | -1.71329500 | 1.55525300  | 3.39064900  |
| C | -2.60828100 | 0.48768000  | 3.09830600  |
| C | -3.53398300 | 0.69337500  | 2.01030000  |
| C | -3.59478500 | 1.92476700  | 1.23279900  |

|    |             |             |             |
|----|-------------|-------------|-------------|
| C  | -3.97463300 | 1.54039500  | -0.14776600 |
| C  | -3.38726200 | 2.21856200  | -1.31345700 |
| C  | -3.05744100 | 1.35640800  | -2.43109600 |
| C  | -1.89511200 | 1.57651600  | -3.28198900 |
| C  | -0.95447600 | 2.60591300  | -2.99204500 |
| C  | 0.42246100  | 2.37705700  | -3.32709900 |
| C  | 1.48921000  | 2.89958300  | -2.51373200 |
| C  | 1.20903300  | 3.67878700  | -1.35208400 |
| C  | 2.12696800  | 3.52877500  | -0.25026100 |
| C  | 1.63130500  | 3.59650400  | 1.09981000  |
| C  | 0.24579300  | 3.84762300  | 1.39970000  |
| C  | -0.30592000 | 3.21512400  | 2.55319700  |
| C  | -1.68507600 | 2.75671400  | 2.57015800  |
| C  | -2.61616200 | 2.98807200  | 1.48688200  |
| C  | -2.07740600 | 3.71020800  | 0.32577600  |
| C  | -2.45987300 | 3.33249600  | -1.05691900 |
| C  | -1.25454100 | 3.46617400  | -1.87091400 |
| C  | -0.17112600 | 3.95935000  | -1.05245100 |
| C  | -0.65953300 | 4.06512700  | 0.29813300  |
| C  | -1.48912800 | -2.92679300 | 2.51169300  |
| C  | -0.41370200 | -2.37508300 | 3.32511000  |
| C  | 0.95162300  | -2.60552900 | 2.99422800  |
| C  | 1.90328300  | -1.57161100 | 3.28848800  |
| C  | 3.04002900  | -1.33388800 | 2.43783800  |
| C  | 3.26653400  | -2.13373400 | 1.27758100  |
| C  | 3.86293500  | -1.46051900 | 0.14975800  |
| C  | 3.47024300  | -1.83373700 | -1.18497600 |
| C  | 2.52734700  | -2.88960600 | -1.44578600 |
| C  | 1.66549400  | -2.74497300 | -2.57379500 |
| C  | 0.29808400  | -3.23898700 | -2.54533700 |
| C  | -0.25811100 | -3.98648400 | -1.43708600 |
| C  | -1.67841600 | -3.75278700 | -1.14175000 |
| C  | -2.16956500 | -3.66548900 | 0.25511000  |
| C  | -1.24998800 | -3.81558000 | 1.39345400  |
| C  | 0.15684600  | -4.11955700 | 1.09659200  |
| C  | 1.21147800  | -3.47558900 | 1.87191300  |
| C  | 2.34327300  | -3.20679500 | 1.01629000  |
| C  | 1.98261700  | -3.60628500 | -0.31930900 |
| C  | 0.64767700  | -4.20116800 | -0.29998000 |
| La | -0.36802100 | -1.85180400 | -0.00331000 |
| La | -1.42665700 | 1.24075300  | -0.00211000 |
| La | 1.78929900  | 0.60893400  | -0.00422000 |



Nd<sub>3</sub>@C<sub>80</sub> PBE/6-31G\*~MWB49

|   |             |             |             |
|---|-------------|-------------|-------------|
| C | 1.91101800  | -3.30818800 | 1.39916100  |
| C | 2.07502500  | -2.49397900 | 2.55533000  |
| C | 0.93789300  | -2.16955200 | 3.38183500  |
| C | 1.12540800  | -0.82747300 | 3.87166800  |
| C | 0.00801500  | 0.04772800  | 4.08592800  |
| C | 0.20482300  | 1.44963900  | 3.84763800  |
| C | -0.85604000 | 2.27493700  | 3.32891000  |
| C | -0.28312800 | 3.31036800  | 2.48334800  |
| C | -0.99770900 | 3.94272200  | 1.38265200  |
| C | -0.17580200 | 4.28117500  | 0.20256500  |
| C | -0.66891100 | 4.06985400  | -1.18479300 |
| C | 0.47117400  | 3.59562800  | -1.96991200 |
| C | 0.37162300  | 2.67015100  | -3.07687100 |
| C | 1.49775200  | 1.83149000  | -3.37707400 |
| C | 1.30541100  | 0.48728000  | -3.86046100 |
| C | 2.36689700  | -0.33500900 | -3.33686500 |
| C | 2.14906000  | -1.71578000 | -3.02954700 |
| C | 2.89445900  | -2.24367500 | -1.90764300 |
| C | 2.26162200  | -3.21894200 | -1.05412900 |
| C | 2.77662300  | -3.03350400 | 0.27783600  |
| C | 0.60238300  | -3.86173700 | 1.13747400  |
| C | 0.11448900  | -4.12127000 | -0.19249700 |
| C | 0.93949500  | -3.73771600 | -1.31558900 |
| C | 0.26238200  | -3.28357700 | -2.48449800 |
| C | 0.86127700  | -2.27698900 | -3.32729900 |
| C | -0.20330700 | -1.44898900 | -3.83597700 |
| C | -0.00815700 | -0.04801400 | -4.07736800 |
| C | -1.12551100 | 0.82550100  | -3.86092600 |
| C | -0.93687000 | 2.16383500  | -3.36004100 |
| C | -2.07826500 | 2.52725000  | -2.53491200 |
| C | -2.01122500 | 3.49738300  | -1.44990000 |
| C | -2.86004700 | 3.20742000  | -0.27265700 |
| C | -2.36073500 | 3.41897200  | 1.11514100  |
| C | -2.85224900 | 2.29546500  | 1.91661000  |
| C | -2.14318800 | 1.71797000  | 3.03735300  |
| C | -2.37294300 | 0.33809900  | 3.36132500  |
| C | -1.30736300 | -0.48612200 | 3.87366900  |
| C | -1.49785600 | -1.82513600 | 3.37694200  |
| C | -0.37604400 | -2.66496000 | 3.08251400  |
| C | -0.53516100 | -3.58336300 | 1.97749400  |
| C | -1.76248400 | -3.72901000 | 1.19360900  |
| C | -1.35087000 | -4.08452800 | -0.19257600 |
| C | -2.04616900 | -3.51997500 | -1.37205500 |

|    |             |             |             |
|----|-------------|-------------|-------------|
| C  | -1.18394700 | -3.10646100 | -2.47315400 |
| C  | -1.45005900 | -1.94753900 | -3.31215900 |
| C  | -2.53901600 | -1.06249700 | -3.02863100 |
| C  | -2.37899800 | 0.32738000  | -3.35215700 |
| C  | -2.95638600 | 1.36526000  | -2.53231500 |
| C  | -3.69490500 | 1.02909900  | -1.36133700 |
| C  | -3.62312100 | 1.95649000  | -0.25478900 |
| C  | -3.65280000 | 1.43079800  | 1.08574600  |
| C  | -3.82949700 | 0.02566200  | 1.37279200  |
| C  | -3.21646400 | -0.50078700 | 2.54454900  |
| C  | -2.69143900 | -1.85917600 | 2.54756700  |
| C  | -2.89215100 | -2.80754300 | 1.46206500  |
| C  | -3.61643300 | -2.28932100 | 0.28453200  |
| C  | -3.21020800 | -2.63718000 | -1.10444500 |
| C  | -3.37738300 | -1.42270000 | -1.90555900 |
| C  | -3.90862700 | -0.37000600 | -1.07469100 |
| C  | -4.01538400 | -0.88239900 | 0.26658700  |
| C  | 2.99069000  | -1.36140900 | 2.53052800  |
| C  | 2.37464200  | -0.33154500 | 3.35199400  |
| C  | 2.53762500  | 1.05517100  | 3.03415400  |
| C  | 1.45493400  | 1.94989100  | 3.33356000  |
| C  | 1.15620200  | 3.08362000  | 2.49283200  |
| C  | 1.92863900  | 3.33023000  | 1.32260600  |
| C  | 1.24299400  | 3.92451200  | 0.20051000  |
| C  | 1.64327300  | 3.54954700  | -1.13102000 |
| C  | 2.75005600  | 2.66012000  | -1.39323800 |
| C  | 2.67945400  | 1.82877600  | -2.54847800 |
| C  | 3.24782100  | 0.48787500  | -2.52231500 |
| C  | 4.04962900  | -0.03439500 | -1.42274700 |
| C  | 3.87090400  | -1.47834600 | -1.13063600 |
| C  | 3.79520000  | -1.98364800 | 0.26680500  |
| C  | 3.90183400  | -1.07950000 | 1.43008800  |
| C  | 4.13141300  | 0.35635700  | 1.13635500  |
| C  | 3.39986300  | 1.35907200  | 1.91369700  |
| C  | 3.05918300  | 2.46938100  | 1.05979100  |
| C  | 3.50956700  | 2.15511500  | -0.27173200 |
| C  | 4.21087600  | 0.86834600  | -0.26038800 |
| Nd | -1.22045200 | -1.60807500 | -0.01127300 |
| Nd | 2.00479200  | -0.25023000 | -0.01150000 |
| Nd | -0.78681800 | 1.85894300  | -0.01446600 |

Gd<sub>3</sub>@C<sub>80</sub> PBE/6-31G\*~MWB53

|   |            |             |            |
|---|------------|-------------|------------|
| C | 1.94038000 | -2.22084900 | 2.75843800 |
|---|------------|-------------|------------|

|   |             |             |             |
|---|-------------|-------------|-------------|
| C | 1.71375400  | -1.07136600 | 3.55843800  |
| C | 0.38466500  | -0.73224400 | 4.00345700  |
| C | 0.27575000  | 0.70015100  | 4.01758300  |
| C | -0.96341900 | 1.33816000  | 3.69734900  |
| C | -0.90641700 | 2.59270500  | 2.99733000  |
| C | -1.94297900 | 3.04076200  | 2.09514400  |
| C | -1.32039300 | 3.88646500  | 1.06072200  |
| C | -1.80175100 | 3.90540400  | -0.32769100 |
| C | -0.74935300 | 3.89760300  | -1.34340900 |
| C | -0.84316100 | 3.13994600  | -2.58598200 |
| C | 0.48336100  | 2.78512700  | -3.02367300 |
| C | 0.73852400  | 1.56249200  | -3.72553100 |
| C | 1.99727400  | 0.91104900  | -3.50623400 |
| C | 2.10643600  | -0.52280700 | -3.52174900 |
| C | 3.11609100  | -0.90180000 | -2.57019900 |
| C | 2.99978600  | -2.11921700 | -1.83188200 |
| C | 3.52661000  | -2.10015300 | -0.48833600 |
| C | 2.83847300  | -2.84862700 | 0.53030400  |
| C | 2.98565800  | -2.14855700 | 1.77433600  |
| C | 0.82063300  | -3.08167500 | 2.48403600  |
| C | 0.69967200  | -3.84270400 | 1.27030500  |
| C | 1.69114300  | -3.67652000 | 0.24509500  |
| C | 1.26257000  | -3.78748900 | -1.10792400 |
| C | 1.90410400  | -2.99696000 | -2.13050300 |
| C | 0.89400800  | -2.61417300 | -3.08110900 |
| C | 0.96041500  | -1.35263800 | -3.75737700 |
| C | -0.27409900 | -0.69883600 | -4.05107000 |
| C | -0.38318800 | 0.73663700  | -4.03700500 |
| C | -1.71457700 | 1.08487300  | -3.60459200 |
| C | -1.95186500 | 2.26301100  | -2.82858600 |
| C | -2.99961000 | 2.23890300  | -1.82818700 |
| C | -2.98597100 | 3.05766500  | -0.60606400 |
| C | -3.57549100 | 2.20293400  | 0.45442600  |
| C | -3.06480700 | 2.16346000  | 1.81781900  |
| C | -3.13510900 | 0.91831700  | 2.53913400  |
| C | -2.12040600 | 0.52449200  | 3.48926100  |
| C | -2.01203400 | -0.90871900 | 3.47501600  |
| C | -0.74525400 | -1.54226900 | 3.66717900  |
| C | -0.50131800 | -2.75927200 | 2.93988000  |
| C | -1.46120600 | -3.34725500 | 2.03177600  |
| C | -0.71852700 | -4.07084600 | 0.98104400  |
| C | -1.19149100 | -4.12418600 | -0.41134700 |
| C | -0.15428100 | -3.93321800 | -1.42495500 |
| C | -0.36302100 | -3.17236800 | -2.65103800 |

|    |             |             |             |
|----|-------------|-------------|-------------|
| C  | -1.59097300 | -2.46722100 | -2.87654000 |
| C  | -1.53685000 | -1.25256800 | -3.62940400 |
| C  | -2.42137800 | -0.14737200 | -3.34891100 |
| C  | -3.34094400 | -0.22841400 | -2.27486000 |
| C  | -3.62562700 | 0.97314700  | -1.53822900 |
| C  | -3.96502900 | 0.94017600  | -0.14306300 |
| C  | -4.01351700 | -0.30948100 | 0.57902200  |
| C  | -3.66260000 | -0.29786200 | 1.95263500  |
| C  | -2.95718500 | -1.43261600 | 2.51538500  |
| C  | -2.70229200 | -2.63911200 | 1.76967200  |
| C  | -3.19964800 | -2.72180400 | 0.40379800  |
| C  | -2.48643800 | -3.45257200 | -0.67272000 |
| C  | -2.62565000 | -2.62031400 | -1.87629100 |
| C  | -3.43917100 | -1.47326900 | -1.56298600 |
| C  | -3.77794400 | -1.52144400 | -0.16842800 |
| C  | 2.44432500  | 0.15223300  | 3.29691800  |
| C  | 1.53756300  | 1.24540700  | 3.58216100  |
| C  | 1.58662400  | 2.43291100  | 2.80714500  |
| C  | 0.35066900  | 3.12214800  | 2.55161300  |
| C  | 0.11495000  | 3.87738100  | 1.35166600  |
| C  | 1.11709900  | 3.88609400  | 0.32541300  |
| C  | 0.67317400  | 3.95934400  | -1.02565600 |
| C  | 1.42509200  | 3.29553700  | -2.06304300 |
| C  | 2.64190800  | 2.58827800  | -1.78176200 |
| C  | 2.93941300  | 1.41814900  | -2.54534700 |
| C  | 3.67253700  | 0.30102700  | -1.96116500 |
| C  | 4.26163700  | 0.33173800  | -0.62732100 |
| C  | 4.17938900  | -0.93802700 | 0.12015200  |
| C  | 3.80077400  | -0.96836900 | 1.55429300  |
| C  | 3.48076800  | 0.24164300  | 2.29892300  |
| C  | 3.61354400  | 1.50144100  | 1.58043200  |
| C  | 2.62979300  | 2.54007100  | 1.82367200  |
| C  | 2.37757200  | 3.23617600  | 0.59467500  |
| C  | 3.16897300  | 2.62124800  | -0.43842600 |
| C  | 3.99084700  | 1.55839900  | 0.14675900  |
| Gd | -0.86339900 | -1.79583500 | 0.01673300  |
| Gd | 1.99413200  | 0.15253800  | 0.13934500  |
| Gd | -1.14207500 | 1.63134300  | 0.01606400  |

Tb<sub>3</sub>@C<sub>80</sub> PBE/6-31G\*~MWB54

|   |            |            |             |
|---|------------|------------|-------------|
| C | 3.22873300 | 0.25246400 | -2.42885000 |
| C | 2.25315000 | 0.24328400 | -3.45521600 |
| C | 1.38624200 | 1.38187600 | -3.64177400 |

|   |             |             |             |
|---|-------------|-------------|-------------|
| C | 0.08997400  | 0.87974600  | -4.02830200 |
| C | -1.10926700 | 1.54988800  | -3.64202700 |
| C | -2.26382200 | 0.73818700  | -3.38178700 |
| C | -3.21872000 | 1.09811500  | -2.36792100 |
| C | -3.78242800 | -0.11814700 | -1.78839300 |
| C | -4.30769400 | -0.19558900 | -0.42648800 |
| C | -4.00406900 | -1.45680300 | 0.27441300  |
| C | -3.54866500 | -1.47535200 | 1.68169200  |
| C | -2.59809800 | -2.55577100 | 1.83563500  |
| C | -1.51009100 | -2.51814200 | 2.77149400  |
| C | -0.30499800 | -3.21972400 | 2.41862200  |
| C | 0.98726400  | -2.74889400 | 2.82779800  |
| C | 1.97179400  | -3.19846800 | 1.86613500  |
| C | 3.09866800  | -2.32544500 | 1.56840000  |
| C | 3.52459000  | -2.30004900 | 0.17799100  |
| C | 3.92778300  | -1.02592700 | -0.38450400 |
| C | 3.51646700  | -0.98503800 | -1.75961200 |
| C | 3.39632700  | 1.46090200  | -1.66828100 |
| C | 3.80549600  | 1.43556300  | -0.29138800 |
| C | 4.04611100  | 0.18434800  | 0.38911400  |
| C | 3.76304100  | 0.11563900  | 1.77695000  |
| C | 3.23245300  | -1.11278000 | 2.33620600  |
| C | 2.27884400  | -0.73582200 | 3.35554500  |
| C | 1.11162500  | -1.52961100 | 3.58355100  |
| C | -0.09302400 | -0.87856700 | 3.99363500  |
| C | -1.38978900 | -1.37108700 | 3.59722300  |
| C | -2.27600700 | -0.24311300 | 3.40720500  |
| C | -3.34659800 | -0.25872300 | 2.44582000  |
| C | -3.68070100 | 0.98822700  | 1.77885500  |
| C | -4.14613800 | 1.03662100  | 0.37247800  |
| C | -3.49582800 | 2.21355900  | -0.21555800 |
| C | -3.03210800 | 2.27847700  | -1.58174900 |
| C | -1.92666800 | 3.13787500  | -1.89485000 |
| C | -0.97611200 | 2.77615700  | -2.91390100 |
| C | 0.31510200  | 3.28204700  | -2.52312200 |
| C | 1.51247300  | 2.55972300  | -2.84188300 |
| C | 2.60217300  | 2.64274400  | -1.89032000 |
| C | 2.54646600  | 3.42119800  | -0.64382900 |
| C | 3.29095400  | 2.62333500  | 0.36222900  |
| C | 2.85463400  | 2.48265000  | 1.74482800  |
| C | 3.11688800  | 1.23989500  | 2.42482600  |
| C | 2.20790100  | 0.69818400  | 3.40898500  |
| C | 0.96872300  | 1.35360800  | 3.69291000  |
| C | -0.16360900 | 0.55630300  | 4.04786800  |

|    |             |             |             |
|----|-------------|-------------|-------------|
| C  | -1.50317600 | 0.94822500  | 3.68477500  |
| C  | -1.73999000 | 2.13939900  | 2.95137400  |
| C  | -2.83041400 | 2.13734700  | 2.01408200  |
| C  | -2.73449000 | 2.89472200  | 0.79951600  |
| C  | -1.57843100 | 3.70334300  | 0.49571600  |
| C  | -1.21273600 | 3.86192800  | -0.87061900 |
| C  | 0.18794900  | 3.98370600  | -1.25305900 |
| C  | 1.27788500  | 4.09705100  | -0.28656400 |
| C  | 0.87126900  | 3.97999100  | 1.11775600  |
| C  | 1.64503800  | 3.20021600  | 2.09760500  |
| C  | 0.71897100  | 2.60647300  | 3.03449200  |
| C  | -0.61443600 | 2.98443200  | 2.66241200  |
| C  | -0.53467000 | 3.78945400  | 1.47475300  |
| C  | 1.50223500  | -0.95645800 | -3.73469300 |
| C  | 0.16117300  | -0.55731200 | -4.08199100 |
| C  | -0.96515200 | -1.36946600 | -3.75000600 |
| C  | -2.19238400 | -0.69694400 | -3.43434200 |
| C  | -3.10343400 | -1.22525700 | -2.45488800 |
| C  | -2.79760600 | -2.43914200 | -1.76208600 |
| C  | -3.25268800 | -2.52100100 | -0.39717300 |
| C  | -2.43231200 | -3.20611600 | 0.56698700  |
| C  | -1.20571000 | -3.87210000 | 0.20505200  |
| C  | -0.14933800 | -3.93344100 | 1.17988100  |
| C  | 1.27133100  | -3.98257500 | 0.82639800  |
| C  | 1.66979000  | -3.91939400 | -0.58917000 |
| C  | 2.84607400  | -3.07747400 | -0.88484900 |
| C  | 2.82613800  | -2.20948700 | -2.06620100 |
| C  | 1.74193300  | -2.16945000 | -3.01876100 |
| C  | 0.62562600  | -3.02995500 | -2.75971900 |
| C  | -0.70980500 | -2.63009500 | -3.11949500 |
| C  | -1.61843300 | -3.16402700 | -2.13890600 |
| C  | -0.83389400 | -3.88747700 | -1.16761200 |
| C  | 0.57271700  | -3.83476600 | -1.54800700 |
| Tb | 0.95783800  | 1.74633800  | 0.01118300  |
| Tb | 1.06556400  | -1.68545800 | 0.01223800  |
| Tb | -2.00203000 | -0.06290200 | 0.14612000  |

Dy<sub>3</sub>@C<sub>80</sub> PBE/6-31G\*~MWB55

|   |             |            |             |
|---|-------------|------------|-------------|
| C | 3.24629900  | 0.24276700 | -2.41263000 |
| C | 2.27364200  | 0.25391200 | -3.44205100 |
| C | 1.41949200  | 1.40334900 | -3.62146600 |
| C | 0.12003000  | 0.91955900 | -4.02122500 |
| C | -1.07396400 | 1.59773200 | -3.63269700 |

|   |             |             |             |
|---|-------------|-------------|-------------|
| C | -2.23850600 | 0.79616400  | -3.38695100 |
| C | -3.19205400 | 1.15598200  | -2.37187300 |
| C | -3.76771000 | -0.06032200 | -1.80512300 |
| C | -4.29889600 | -0.14484100 | -0.44742000 |
| C | -4.00681800 | -1.41278400 | 0.24033700  |
| C | -3.56375200 | -1.45257200 | 1.64896700  |
| C | -2.63236700 | -2.54889400 | 1.79957700  |
| C | -1.55039200 | -2.53094200 | 2.74141300  |
| C | -0.35073800 | -3.24043700 | 2.38604200  |
| C | 0.94386500  | -2.78564800 | 2.80523000  |
| C | 1.92756200  | -3.23600600 | 1.84382800  |
| C | 3.06078000  | -2.36784400 | 1.55923000  |
| C | 3.48979300  | -2.33031600 | 0.17339400  |
| C | 3.91920700  | -1.06065900 | -0.37625100 |
| C | 3.51754600  | -1.00294600 | -1.75366000 |
| C | 3.42202400  | 1.44171200  | -1.63799200 |
| C | 3.82343000  | 1.39796400  | -0.25866300 |
| C | 4.04895800  | 0.13785100  | 0.41113300  |
| C | 3.75595600  | 0.05780000  | 1.79678900  |
| C | 3.20985100  | -1.16863900 | 2.34323900  |
| C | 2.25502300  | -0.79255000 | 3.36160200  |
| C | 1.07869000  | -1.57647800 | 3.57584800  |
| C | -0.12137400 | -0.91742600 | 3.98648300  |
| C | -1.42084600 | -1.39265000 | 3.57824200  |
| C | -2.29329600 | -0.25304100 | 3.39520900  |
| C | -3.35658700 | -0.24751200 | 2.42684500  |
| C | -3.67740900 | 1.00945200  | 1.77213500  |
| C | -4.13654300 | 1.07750200  | 0.36454200  |
| C | -3.47116300 | 2.25313500  | -0.20916600 |
| C | -2.99929300 | 2.32630100  | -1.57292000 |
| C | -1.88331400 | 3.17621300  | -1.87182500 |
| C | -0.93217200 | 2.81426100  | -2.89059400 |
| C | 0.36251700  | 3.30101300  | -2.48760100 |
| C | 1.55444000  | 2.57145500  | -2.80912800 |
| C | 2.64163400  | 2.63409400  | -1.85215500 |
| C | 2.58665600  | 3.39942700  | -0.59717300 |
| C | 3.31745600  | 2.58372000  | 0.40405400  |
| C | 2.86844800  | 2.43078800  | 1.78152000  |
| C | 3.11695500  | 1.18147500  | 2.45240100  |
| C | 2.19809100  | 0.64134600  | 3.42818800  |
| C | 0.96462300  | 1.30698700  | 3.71412500  |
| C | -0.17733400 | 0.51765500  | 4.05618800  |
| C | -1.51035700 | 0.92751900  | 3.68960500  |
| C | -1.73163000 | 2.12910600  | 2.96791400  |

|    |             |             |             |
|----|-------------|-------------|-------------|
| C  | -2.81601200 | 2.14679000  | 2.02306500  |
| C  | -2.70774100 | 2.91591800  | 0.81678700  |
| C  | -1.54182600 | 3.71495600  | 0.52719600  |
| C  | -1.16668300 | 3.88065200  | -0.83594400 |
| C  | 0.23586600  | 3.98905400  | -1.21073100 |
| C  | 1.32094400  | 4.07661600  | -0.23816500 |
| C  | 0.90455100  | 3.94547500  | 1.15900200  |
| C  | 1.66475400  | 3.15340900  | 2.13547200  |
| C  | 0.73009000  | 2.56811600  | 3.06789800  |
| C  | -0.59733600 | 2.96615600  | 2.69442300  |
| C  | -0.50378100 | 3.77688500  | 1.51191200  |
| C  | 1.51111100  | -0.93433100 | -3.73916000 |
| C  | 0.17622600  | -0.51785400 | -4.09004400 |
| C  | -0.96007400 | -1.32119900 | -3.76945300 |
| C  | -2.18130400 | -0.63924400 | -3.45234300 |
| C  | -3.10017500 | -1.16755800 | -2.48035200 |
| C  | -2.81266800 | -2.39247900 | -1.79962000 |
| C  | -3.27080300 | -2.48149300 | -0.43761100 |
| C  | -2.46838200 | -3.18915100 | 0.52484200  |
| C  | -1.24747900 | -3.86280100 | 0.16134900  |
| C  | -0.19645200 | -3.94505600 | 1.14135000  |
| C  | 1.22584900  | -4.00560000 | 0.79445000  |
| C  | 1.62956000  | -3.92843000 | -0.61882000 |
| C  | 2.80770300  | -3.08837800 | -0.89828000 |
| C  | 2.80943200  | -2.21326200 | -2.07298900 |
| C  | 1.73335400  | -2.15502100 | -3.03125900 |
| C  | 0.60747400  | -3.00689000 | -2.78558200 |
| C  | -0.72147000 | -2.59036200 | -3.14873500 |
| C  | -1.64074300 | -3.12613700 | -2.17900800 |
| C  | -0.86932000 | -3.86636300 | -1.21004900 |
| C  | 0.53949700  | -3.82306700 | -1.58241300 |
| Dy | 1.00059800  | 1.72201300  | 0.00855800  |
| Dy | 1.01736300  | -1.71459400 | 0.01294400  |
| Dy | -2.00256200 | -0.01133600 | 0.14007000  |

Ho<sub>3</sub>@C<sub>80</sub> PBE/6-31G\*~MWB56

|   |             |             |            |
|---|-------------|-------------|------------|
| C | -3.65804100 | 1.14369800  | 1.39529200 |
| C | -3.21854200 | 0.44058000  | 2.54935300 |
| C | -2.17333700 | 0.96958900  | 3.38753800 |
| C | -1.41207500 | -0.13973300 | 3.90281700 |
| C | -0.00067800 | -0.02636500 | 4.11832400 |
| C | 0.80503400  | -1.19036100 | 3.89936000 |
| C | 2.14531800  | -1.07787500 | 3.39075000 |



|   |             |             |             |
|---|-------------|-------------|-------------|
| C | 2.40905100  | -2.21357700 | 2.53739800  |
| C | 3.29070300  | -2.13888000 | 1.40498100  |
| C | 2.92181500  | -2.92397500 | 0.25130500  |
| C | 3.16244000  | -2.45510200 | -1.11011400 |
| C | 2.07165900  | -2.95542100 | -1.92891900 |
| C | 1.55408400  | -2.22539800 | -3.04593200 |
| C | 0.16358000  | -2.36913100 | -3.35232700 |
| C | -0.60308200 | -1.25386700 | -3.84019300 |
| C | -1.94332000 | -1.36677900 | -3.33023100 |
| C | -2.71963300 | -0.20303900 | -3.03664500 |
| C | -3.60406400 | -0.29785400 | -1.91574600 |
| C | -3.84140300 | 0.84581600  | -1.07185100 |
| C | -4.07310300 | 0.36981400  | 0.26735300  |
| C | -3.08540500 | 2.44457800  | 1.13183700  |
| C | -2.92510300 | 2.98807200  | -0.20216400 |
| C | -3.23198900 | 2.12015600  | -1.32969500 |
| C | -2.40310100 | 2.21818300  | -2.48874100 |
| C | -2.15150600 | 1.07668200  | -3.33322000 |
| C | -0.80381100 | 1.18706100  | -3.82448100 |
| C | 0.00155000  | 0.02585200  | -4.05594600 |
| C | 1.41160000  | 0.13966900  | -3.83050200 |
| C | 2.17681800  | -0.96908100 | -3.32563400 |
| C | 3.24911300  | -0.45090600 | -2.49600600 |
| C | 3.82312600  | -1.18665600 | -1.38652400 |
| C | 4.30382300  | -0.40833600 | -0.22250500 |
| C | 4.00531400  | -0.88639500 | 1.15263800  |
| C | 3.62361300  | 0.26476800  | 1.95853400  |
| C | 2.70855900  | 0.19891500  | 3.07823600  |
| C | 1.94461900  | 1.36523400  | 3.39151600  |
| C | 0.60570500  | 1.25448900  | 3.91103300  |
| C | -0.15782200 | 2.36348300  | 3.40876600  |
| C | -1.54248700 | 2.21641700  | 3.08735700  |
| C | -2.05035700 | 2.98698200  | 1.97267600  |
| C | -1.23992300 | 3.90001500  | 1.18015600  |
| C | -1.79598600 | 3.93356200  | -0.19613800 |
| C | -0.87586300 | 3.91707000  | -1.35578600 |
| C | -1.21951300 | 3.06149300  | -2.47488700 |
| C | -0.22939200 | 2.39853800  | -3.30394400 |
| C | 1.16810200  | 2.48495200  | -3.01613900 |
| C | 1.99143600  | 1.35733900  | -3.32959600 |
| C | 3.11022200  | 0.99640800  | -2.49492500 |
| C | 3.44492700  | 1.75155500  | -1.32972700 |
| C | 4.04882600  | 1.04176700  | -0.21242700 |
| C | 3.66561800  | 1.43953700  | 1.12805600  |

|    |             |             |             |
|----|-------------|-------------|-------------|
| C  | 2.82673400  | 2.58342400  | 1.40610800  |
| C  | 2.00441100  | 2.54291700  | 2.56414600  |
| C  | 0.69879700  | 3.16811900  | 2.56864000  |
| C  | 0.20018200  | 3.90451300  | 1.44060200  |
| C  | 1.07039800  | 3.98876000  | 0.29323700  |
| C  | 0.55118200  | 3.97532200  | -1.07083000 |
| C  | 1.53448700  | 3.28818600  | -1.88998400 |
| C  | 2.64834700  | 2.91492300  | -1.05639500 |
| C  | 2.35867200  | 3.34036800  | 0.28812100  |
| C  | -3.10662100 | -1.00367400 | 2.54043600  |
| C  | -1.98699200 | -1.35125100 | 3.38504800  |
| C  | -1.16515300 | -2.47446700 | 3.05905700  |
| C  | 0.22841400  | -2.39970700 | 3.36884500  |
| C  | 1.21439900  | -3.03323500 | 2.53140400  |
| C  | 0.83090700  | -3.75289400 | 1.36681600  |
| C  | 1.71517800  | -3.71458000 | 0.24417400  |
| C  | 1.19479000  | -3.73980400 | -1.09818000 |
| C  | -0.21218400 | -3.84497100 | -1.36581200 |
| C  | -0.70411200 | -3.16501800 | -2.52113100 |
| C  | -2.02561500 | -2.56120300 | -2.50978600 |
| C  | -2.94348500 | -2.70180600 | -1.39734100 |
| C  | -3.71234500 | -1.50003400 | -1.10776500 |
| C  | -3.99166200 | -1.07068400 | 0.25951000  |
| C  | -3.49147600 | -1.79451800 | 1.40384600  |
| C  | -2.76648400 | -3.03830400 | 1.13768100  |
| C  | -1.57372100 | -3.29104700 | 1.93508500  |
| C  | -0.58065800 | -3.90592600 | 1.09381400  |
| C  | -1.12318400 | -4.02359300 | -0.24562700 |
| C  | -2.50639000 | -3.51971300 | -0.24417700 |
| Ho | -0.66219400 | 1.87856900  | -0.05769100 |
| Ho | -1.29995300 | -1.51024800 | -0.06093600 |
| Ho | 1.95910800  | -0.36685700 | -0.06440700 |

Er<sub>3</sub>@C<sub>80</sub> PBE/6-31G\*~MWB57

|   |             |             |            |
|---|-------------|-------------|------------|
| C | -2.17008900 | 2.80975800  | 1.98369800 |
| C | -2.10805300 | 1.83167300  | 3.01209200 |
| C | -0.87591000 | 1.55502100  | 3.70696500 |
| C | -0.85182000 | 0.15409000  | 4.03436300 |
| C | 0.37831400  | -0.57757400 | 4.03023000 |
| C | 0.33243100  | -1.94575400 | 3.61331900 |
| C | 1.43534500  | -2.53562400 | 2.90552400 |
| C | 0.91239300  | -3.50101600 | 1.96248500 |
| C | 1.57897400  | -3.81745200 | 0.72329300 |

|   |             |             |             |
|---|-------------|-------------|-------------|
| C | 0.69595800  | -4.07330000 | -0.39779700 |
| C | 1.01818400  | -3.61798700 | -1.73895700 |
| C | -0.22302800 | -3.31659900 | -2.41849100 |
| C | -0.31592400 | -2.27042900 | -3.38821200 |
| C | -1.55389100 | -1.55754500 | -3.48422600 |
| C | -1.57674900 | -0.15133000 | -3.78615000 |
| C | -2.67870300 | 0.44532900  | -3.08033900 |
| C | -2.60823800 | 1.79200900  | -2.60697000 |
| C | -3.27343400 | 2.06044900  | -1.36867900 |
| C | -2.72724400 | 3.01100500  | -0.43395100 |
| C | -3.06472200 | 2.57328800  | 0.89512500  |
| C | -0.97523400 | 3.56966800  | 1.70595300  |
| C | -0.65601700 | 4.10343100  | 0.40005400  |
| C | -1.51412900 | 3.73328500  | -0.71123700 |
| C | -0.89724700 | 3.51584200  | -1.98034800 |
| C | -1.43349800 | 2.55322200  | -2.91344500 |
| C | -0.32420800 | 1.94751900  | -3.59935800 |
| C | -0.36582600 | 0.57726700  | -4.01866200 |
| C | 0.86182000  | -0.15695900 | -4.01187100 |
| C | 0.88462400  | -1.55895500 | -3.68912100 |
| C | 2.11938800  | -1.84323700 | -2.99221100 |
| C | 2.23160800  | -2.88120700 | -2.00508100 |
| C | 3.19567400  | -2.70575800 | -0.91036100 |
| C | 2.87881200  | -3.17980600 | 0.45832400  |
| C | 3.32839300  | -2.13079900 | 1.38610300  |
| C | 2.62199000  | -1.78976900 | 2.61003900  |
| C | 2.70011300  | -0.44949800 | 3.10466800  |
| C | 1.59410700  | 0.14551700  | 3.81398600  |
| C | 1.57187800  | 1.54868100  | 3.50407800  |
| C | 0.33126000  | 2.24889200  | 3.38672500  |
| C | 0.25477900  | 3.29707900  | 2.39758100  |
| C | 1.35960000  | 3.67597700  | 1.54084300  |
| C | 0.80709900  | 4.22549800  | 0.28277200  |
| C | 1.44339400  | 3.88707800  | -1.00651200 |
| C | 0.55629600  | 3.53598400  | -2.10390600 |
| C | 0.89173500  | 2.53888200  | -3.10570000 |
| C | 2.09602100  | 1.76903800  | -3.01902900 |
| C | 2.08428000  | 0.43528200  | -3.53290800 |
| C | 2.85512600  | -0.60019000 | -2.89498800 |
| C | 3.66706600  | -0.33475200 | -1.75733100 |
| C | 3.83158000  | -1.39595800 | -0.78221000 |
| C | 3.92770900  | -1.05763100 | 0.62271900  |
| C | 3.93242900  | 0.31437300  | 1.08590000  |
| C | 3.36372500  | 0.59358200  | 2.36053800  |

|    |             |             |             |
|----|-------------|-------------|-------------|
| C  | 2.66162500  | 1.83446800  | 2.60137400  |
| C  | 2.55773300  | 2.84818100  | 1.58967200  |
| C  | 3.21262500  | 2.59876400  | 0.33470500  |
| C  | 2.65204800  | 3.07599900  | -0.93068500 |
| C  | 2.97409100  | 2.06742100  | -1.92908700 |
| C  | 3.74248300  | 1.02422400  | -1.30146300 |
| C  | 3.88742600  | 1.34713200  | 0.09235100  |
| C  | -2.85473400 | 0.59614400  | 2.89974700  |
| C  | -2.06393100 | -0.43749400 | 3.53186500  |
| C  | -2.08812900 | -1.77048300 | 3.02793800  |
| C  | -0.88293800 | -2.53653900 | 3.11556100  |
| C  | -0.53193500 | -3.49014900 | 2.09810700  |
| C  | -1.37535800 | -3.70986300 | 0.97292500  |
| C  | -0.74429400 | -4.03842400 | -0.26594300 |
| C  | -1.31078600 | -3.58690600 | -1.51279400 |
| C  | -2.52804500 | -2.82952900 | -1.56036800 |
| C  | -2.63588600 | -1.82958400 | -2.57489500 |
| C  | -3.35839400 | -0.59242300 | -2.32570600 |
| C  | -4.08932200 | -0.33992200 | -1.10012300 |
| C  | -3.98315200 | 1.03305300  | -0.62442000 |
| C  | -3.83569500 | 1.35621800  | 0.79284000  |
| C  | -3.73630300 | 0.32603500  | 1.79890700  |
| C  | -3.89442200 | -1.05920500 | 1.35373000  |
| C  | -2.99842000 | -2.04858800 | 1.93746700  |
| C  | -2.63095600 | -2.99694000 | 0.91914400  |
| C  | -3.25802000 | -2.59782800 | -0.32298900 |
| C  | -4.08901000 | -1.40773800 | -0.07930000 |
| Er | 0.55783600  | 1.89910000  | -0.01956700 |
| Er | -1.95408400 | -0.44631800 | 0.03135200  |
| Er | 1.36567900  | -1.43827700 | -0.04071600 |

Tm<sub>3</sub>@C<sub>80</sub> PBE/6-31G\*~MWB58

|   |             |             |             |
|---|-------------|-------------|-------------|
| C | -3.34019400 | 1.75426800  | 1.54144800  |
| C | -2.99523200 | 0.96069400  | 2.66842500  |
| C | -1.84495700 | 1.27374100  | 3.47641400  |
| C | -1.28082100 | 0.03572900  | 3.94799500  |
| C | 0.13432300  | -0.11077400 | 4.11422400  |
| C | 0.70703100  | -1.39633700 | 3.84778500  |
| C | 2.02642600  | -1.51517200 | 3.29093300  |
| C | 2.05078500  | -2.66079600 | 2.41081500  |
| C | 2.89262600  | -2.72257700 | 1.24823600  |
| C | 2.34749300  | -3.40422900 | 0.09959800  |
| C | 2.61845300  | -2.95654000 | -1.25924900 |

|   |             |             |             |
|---|-------------|-------------|-------------|
| C | 1.43697600  | -3.24227100 | -2.04985000 |
| C | 1.02540100  | -2.40685800 | -3.13574700 |
| C | -0.37695400 | -2.29092000 | -3.39505400 |
| C | -0.94542000 | -1.04562300 | -3.83923700 |
| C | -2.26535400 | -0.92461500 | -3.28056300 |
| C | -2.80864700 | 0.35343400  | -2.94286000 |
| C | -3.65424500 | 0.39743100  | -1.78966300 |
| C | -3.65603200 | 1.54727700  | -0.92205000 |
| C | -3.92380100 | 1.09281800  | 0.41813200  |
| C | -2.54969300 | 2.93300600  | 1.27444700  |
| C | -2.34056000 | 3.46961200  | -0.05550400 |
| C | -2.83508700 | 2.69610400  | -1.18394400 |
| C | -2.04184900 | 2.66732000  | -2.37207500 |
| C | -2.02830700 | 1.51575200  | -3.24112700 |
| C | -0.70057500 | 1.39218900  | -3.78044200 |
| C | -0.12689900 | 0.10901600  | -4.06019400 |
| C | 1.28642400  | -0.03789600 | -3.88220400 |
| C | 1.85231100  | -1.27626400 | -3.41794500 |
| C | 3.01854000  | -0.97322100 | -2.61249300 |
| C | 3.47454700  | -1.81588900 | -1.53078800 |
| C | 4.13811900  | -1.16889900 | -0.38189900 |
| C | 3.81936700  | -1.61853800 | 0.99549400  |
| C | 3.68221400  | -0.43334700 | 1.83337500  |
| C | 2.80335400  | -0.35527600 | 2.98177400  |
| C | 2.27466300  | 0.92258600  | 3.34111400  |
| C | 0.95554700  | 1.04381100  | 3.90772300  |
| C | 0.38951000  | 2.28371300  | 3.45057800  |
| C | -1.00830100 | 2.39106300  | 3.17306700  |
| C | -1.40355400 | 3.25357100  | 2.08204400  |
| C | -0.46790700 | 4.01365000  | 1.27248600  |
| C | -1.05513900 | 4.18762800  | -0.07745700 |
| C | -0.19410500 | 4.03616800  | -1.26895600 |
| C | -0.72476300 | 3.28280800  | -2.38884900 |
| C | 0.10067700  | 2.46970000  | -3.26244200 |
| C | 1.49847900  | 2.29365800  | -3.01786900 |
| C | 2.09269300  | 1.04418100  | -3.38119900 |
| C | 3.15005000  | 0.47176600  | -2.58801200 |
| C | 3.65620200  | 1.12880500  | -1.42713200 |
| C | 4.15544900  | 0.29999100  | -0.34195100 |
| C | 3.90437600  | 0.73333800  | 1.01887400  |
| C | 3.29646400  | 2.00372600  | 1.34371200  |
| C | 2.52196300  | 2.08962600  | 2.53326300  |
| C | 1.35065800  | 2.93734200  | 2.59463600  |
| C | 0.95308400  | 3.75797100  | 1.48641400  |

|    |             |             |             |
|----|-------------|-------------|-------------|
| C  | 1.78564500  | 3.71674900  | 0.31308000  |
| C  | 1.22501600  | 3.82373600  | -1.02945300 |
| C  | 2.04352700  | 2.99435900  | -1.89620900 |
| C  | 3.09871100  | 2.41271900  | -1.10901600 |
| C  | 2.93779200  | 2.85487100  | 0.25188500  |
| C  | -3.14654200 | -0.47888000 | 2.63438900  |
| C  | -2.08127800 | -1.04101500 | 3.43302200  |
| C  | -1.48905100 | -2.28740600 | 3.06279600  |
| C  | -0.09561900 | -2.47107600 | 3.32158200  |
| C  | 0.72958500  | -3.25175500 | 2.43681100  |
| C  | 0.18539300  | -3.86976700 | 1.27762300  |
| C  | 1.02217700  | -3.97139400 | 0.12431600  |
| C  | 0.46333900  | -3.87931400 | -1.20031700 |
| C  | -0.94559900 | -3.71846000 | -1.41659000 |
| C  | -1.34390200 | -2.93273200 | -2.54117900 |
| C  | -2.53174300 | -2.10012600 | -2.47255400 |
| C  | -3.42004000 | -2.09476000 | -1.32915700 |
| C  | -3.94594700 | -0.78057500 | -0.99387300 |
| C  | -4.10076600 | -0.33742200 | 0.38686400  |
| C  | -3.70081500 | -1.16128100 | 1.49984400  |
| C  | -3.22247200 | -2.50768100 | 1.18887300  |
| C  | -2.07228100 | -2.98958300 | 1.93994100  |
| C  | -1.23708900 | -3.75766100 | 1.05438400  |
| C  | -1.83447600 | -3.74681800 | -0.26495700 |
| C  | -3.10009400 | -2.99927900 | -0.20598900 |
| Tm | -0.34199500 | 1.96305200  | -0.05736100 |
| Tm | -1.55022800 | -1.26083000 | -0.04227200 |
| Tm | 1.86880700  | -0.69464700 | -0.06840000 |

Lu<sub>3</sub>@C<sub>80</sub> PBE/6-31G\*~MWB60

|   |             |             |             |
|---|-------------|-------------|-------------|
| C | -3.68724800 | 0.04071200  | -1.61787100 |
| C | -2.96787300 | 0.03046300  | -2.83724400 |
| C | -2.24434900 | -1.15143400 | -3.24501400 |
| C | -1.04220100 | -0.71429000 | -3.90874300 |
| C | 0.16855800  | -1.46620600 | -3.81480600 |
| C | 1.40366300  | -0.74302400 | -3.81903800 |
| C | 2.52119700  | -1.20022600 | -3.03928200 |
| C | 3.25056700  | -0.04325400 | -2.55450600 |
| C | 4.04023000  | -0.05082800 | -1.34536700 |
| C | 4.04991800  | 1.19521800  | -0.58240000 |
| C | 3.97922100  | 1.19536600  | 0.89240600  |
| C | 3.15471000  | 2.32680800  | 1.28227200  |
| C | 2.31286000  | 2.33037100  | 2.44832500  |

|   |             |             |             |
|---|-------------|-------------|-------------|
| C | 1.12843100  | 3.13503700  | 2.41774200  |
| C | -0.06699700 | 2.69743500  | 3.08589500  |
| C | -1.19936900 | 3.17554500  | 2.33564400  |
| C | -2.41670400 | 2.41249900  | 2.27730500  |
| C | -3.18358600 | 2.49858400  | 1.04514400  |
| C | -3.79436200 | 1.27767100  | 0.56308100  |
| C | -3.73158500 | 1.27348900  | -0.87259200 |
| C | -3.76003300 | -1.18848100 | -0.86951200 |
| C | -3.82221200 | -1.18712500 | 0.56594000  |
| C | -3.81059000 | 0.04596300  | 1.31391100  |
| C | -3.19928400 | 0.04011600  | 2.59230700  |
| C | -2.47858300 | 1.20573900  | 3.05237200  |
| C | -1.34384200 | 0.74010000  | 3.81020000  |
| C | -0.10915100 | 1.45981600  | 3.80967700  |
| C | 1.10446400  | 0.71058300  | 3.91505900  |
| C | 2.29362200  | 1.14014900  | 3.23012500  |
| C | 3.03011800  | -0.03355000 | 2.80593000  |
| C | 3.89375600  | -0.04517000 | 1.65246300  |
| C | 3.94376200  | -1.28805800 | 0.89481700  |
| C | 4.01394600  | -1.29321800 | -0.57878200 |
| C | 3.19664600  | -2.40839800 | -1.03408000 |
| C | 2.45032400  | -2.39465700 | -2.26383300 |
| C | 1.25090500  | -3.17326200 | -2.33340300 |
| C | 0.12379600  | -2.70589000 | -3.09557300 |
| C | -1.07480300 | -3.14879000 | -2.43351700 |
| C | -2.26976300 | -2.35435100 | -2.46610400 |
| C | -3.13188300 | -2.41753900 | -1.29980500 |
| C | -2.82268300 | -3.23572000 | -0.11058800 |
| C | -3.23875100 | -2.41976000 | 1.05074700  |
| C | -2.47180100 | -2.34996800 | 2.28295000  |
| C | -2.50640500 | -1.14080000 | 3.05580800  |
| C | -1.36090900 | -0.70034900 | 3.81224600  |
| C | -0.14343800 | -1.44929400 | 3.81330500  |
| C | 1.08742300  | -0.72888800 | 3.91617500  |
| C | 2.26611900  | -1.18834100 | 3.23222400  |
| C | 2.25749000  | -2.38135700 | 2.45409700  |
| C | 3.09837100  | -2.40171000 | 1.28848000  |
| C | 2.67943700  | -3.11075300 | 0.10976200  |
| C | 1.44172900  | -3.83899400 | 0.06106600  |
| C | 0.74872500  | -3.89019000 | -1.18899700 |
| C | -0.70279500 | -3.91209300 | -1.24960300 |
| C | -1.54257900 | -3.96962200 | -0.05948900 |
| C | -0.80518400 | -3.91394600 | 1.19788700  |
| C | -1.27353800 | -3.14235000 | 2.34342200  |

|    |             |             |             |
|----|-------------|-------------|-------------|
| C  | -0.13030700 | -2.68950600 | 3.09250600  |
| C  | 1.05444100  | -3.15798300 | 2.42624300  |
| C  | 0.64815300  | -3.88313200 | 1.25047800  |
| C  | -2.21663300 | 1.19388700  | -3.24775000 |
| C  | -1.02517800 | 0.72661400  | -3.91049800 |
| C  | 0.20298900  | 1.44973100  | -3.81898900 |
| C  | 1.42053800  | 0.69699900  | -3.82113500 |
| C  | 2.54849900  | 1.12941300  | -3.04268100 |
| C  | 2.50568200  | 2.32655800  | -2.26984800 |
| C  | 3.25338900  | 2.32531500  | -1.04004100 |
| C  | 2.75025500  | 3.04107100  | 0.10179000  |
| C  | 1.53071100  | 3.80007000  | 0.05118800  |
| C  | 0.73918800  | 3.86684700  | 1.24047100  |
| C  | -0.71272500 | 3.93206400  | 1.18788100  |
| C  | -1.44836200 | 4.00118600  | -0.06964500 |
| C  | -2.74776900 | 3.30110400  | -0.11891300 |
| C  | -3.07537400 | 2.48681200  | -1.30615600 |
| C  | -2.21381600 | 2.39910700  | -2.47202100 |
| C  | -1.00024500 | 3.16440800  | -2.44159500 |
| C  | 0.18747500  | 2.69193000  | -3.10297100 |
| C  | 1.32521400  | 3.13353500  | -2.34123200 |
| C  | 0.84006600  | 3.86549200  | -1.19897500 |
| C  | -0.61034600 | 3.92082300  | -1.25934800 |
| Lu | -1.13854300 | -1.64973300 | -0.00360500 |
| Lu | -1.11165400 | 1.66880700  | -0.00401000 |
| Lu | 2.03780200  | -0.00826700 | 0.01797600  |



La<sub>3</sub>@C<sub>80</sub><sup>+</sup> PBE/6-31G\*~MWB46

|   |             |             |             |
|---|-------------|-------------|-------------|
| C | 1.56155000  | -3.51454000 | 1.36654400  |
| C | 1.79983800  | -2.71301400 | 2.51685200  |
| C | 0.70554400  | -2.27800900 | 3.34250500  |
| C | 1.02300000  | -0.96718400 | 3.84103700  |
| C | 0.00265400  | 0.01187100  | 4.05832000  |
| C | 0.33971000  | 1.38417100  | 3.83522000  |
| C | -0.63194900 | 2.31235300  | 3.32020300  |
| C | 0.04989100  | 3.29775200  | 2.49262800  |
| C | -0.59549100 | 3.99725600  | 1.39745800  |
| C | 0.26724200  | 4.28661800  | 0.23465500  |
| C | -0.24617000 | 4.12941900  | -1.15371900 |
| C | 0.84455600  | 3.54916900  | -1.93781100 |
| C | 0.64724000  | 2.63620300  | -3.03800200 |
| C | 1.68387300  | 1.68922400  | -3.34316500 |
| C | 1.35531400  | 0.38104800  | -3.84097900 |
| C | 2.32356900  | -0.55057200 | -3.32546300 |
| C | 1.96372500  | -1.89385800 | -3.02546300 |
| C | 2.65468000  | -2.51590800 | -1.92163500 |
| C | 1.92844200  | -3.43452800 | -1.08068400 |
| C | 2.45527700  | -3.31399600 | 0.25199400  |
| C | 0.20441300  | -3.92702400 | 1.10033600  |
| C | -0.30332100 | -4.11476800 | -0.23201600 |
| C | 0.56106200  | -3.81245800 | -1.34684200 |
| C | -0.06751400 | -3.26784900 | -2.50051500 |
| C | 0.62592500  | -2.31940900 | -3.33005400 |
| C | -0.34222800 | -1.38358500 | -3.83433000 |
| C | -0.00313400 | -0.01192700 | -4.05764500 |
| C | -1.02199700 | 0.96880600  | -3.84059300 |
| C | -0.69700000 | 2.27472100  | -3.33124600 |
| C | -1.80097000 | 2.74696400  | -2.50757300 |
| C | -1.63106700 | 3.68805800  | -1.41691500 |
| C | -2.51725700 | 3.47871100  | -0.25463000 |
| C | -2.00205300 | 3.62874600  | 1.13406200  |
| C | -2.61418500 | 2.55835600  | 1.92191700  |
| C | -1.96078600 | 1.89762300  | 3.02630600  |
| C | -2.33056700 | 0.54496400  | 3.33669100  |
| C | -1.35508500 | -0.38284900 | 3.84134400  |
| C | -1.67448400 | -1.69036100 | 3.33179500  |
| C | -0.65200400 | -2.63488000 | 3.03821400  |
| C | -0.90141700 | -3.53472000 | 1.93760900  |
| C | -2.13683700 | -3.54207500 | 1.15401200  |
| C | -1.75539000 | -3.92043100 | -0.23438700 |
| C | -2.38522000 | -3.26328800 | -1.39725900 |

|    |             |             |             |
|----|-------------|-------------|-------------|
| C  | -1.48823200 | -2.94313900 | -2.49180100 |
| C  | -1.63390700 | -1.75376400 | -3.31939000 |
| C  | -2.61781400 | -0.76907300 | -3.02562800 |
| C  | -2.31721500 | 0.60079000  | -3.33677000 |
| C  | -2.79275200 | 1.67969300  | -2.51291500 |
| C  | -3.58031600 | 1.41361000  | -1.35901800 |
| C  | -3.41146200 | 2.31858500  | -0.24816300 |
| C  | -3.50537600 | 1.79215400  | 1.08685100  |
| C  | -3.82693700 | 0.41194700  | 1.35914700  |
| C  | -3.25352700 | -0.18947500 | 2.51338500  |
| C  | -2.87131000 | -1.59540100 | 2.50797500  |
| C  | -3.15802300 | -2.50757200 | 1.41725900  |
| C  | -3.84564500 | -1.91064700 | 0.25509100  |
| C  | -3.45924200 | -2.28294600 | -1.13360600 |
| C  | -3.50403300 | -1.05068000 | -1.92174400 |
| C  | -3.93735200 | 0.04195600  | -1.08672800 |
| C  | -4.09854500 | -0.46778400 | 0.24835800  |
| C  | 2.82680800  | -1.67945900 | 2.50449500  |
| C  | 2.31323000  | -0.59218300 | 3.32605900  |
| C  | 2.61922200  | 0.76466200  | 3.02679500  |
| C  | 1.63163900  | 1.76281700  | 3.33057300  |
| C  | 1.45846600  | 2.92485300  | 2.50115400  |
| C  | 2.26801700  | 3.11502700  | 1.34712600  |
| C  | 1.64332900  | 3.78419900  | 0.23216600  |
| C  | 2.00627200  | 3.38300900  | -1.10047000 |
| C  | 3.01592600  | 2.38648800  | -1.36638300 |
| C  | 2.85472300  | 1.56611900  | -2.51690300 |
| C  | 3.28384900  | 0.17363800  | -2.50434300 |
| C  | 4.01288100  | -0.43876800 | -1.40954600 |
| C  | 3.70214000  | -1.85784200 | -1.13978100 |
| C  | 3.57859900  | -2.37380300 | 0.25134800  |
| C  | 3.75714300  | -1.47600900 | 1.41008400  |
| C  | 4.14141800  | -0.07491200 | 1.14026800  |
| C  | 3.51931900  | 0.99431100  | 1.92195500  |
| C  | 3.30271700  | 2.14495300  | 1.08093200  |
| C  | 3.71408200  | 1.79379300  | -0.25175600 |
| C  | 4.27225400  | 0.43936600  | -0.25084700 |
| La | 1.92215500  | -0.47322700 | -0.00023200 |
| La | -1.37085800 | -1.42715000 | -0.00013400 |
| La | -0.55042600 | 1.90002800  | -0.00110800 |

Nd<sub>3</sub>@C<sub>80</sub><sup>+</sup> PBE/6-31G\*~MWB49

|   |             |            |            |
|---|-------------|------------|------------|
| C | -2.29444100 | 3.05726800 | 1.36760500 |
|---|-------------|------------|------------|

|   |             |             |             |
|---|-------------|-------------|-------------|
| C | -2.35557600 | 2.24054900  | 2.52558400  |
| C | -1.19346900 | 2.06347500  | 3.35466700  |
| C | -1.21177800 | 0.71473400  | 3.85218600  |
| C | 0.00092100  | -0.01382500 | 4.07088100  |
| C | -0.02314400 | -1.42711500 | 3.84626100  |
| C | 1.12972300  | -2.11381800 | 3.32626900  |
| C | 0.68592000  | -3.22144700 | 2.49433900  |
| C | 1.46711800  | -3.75896200 | 1.39790000  |
| C | 0.69662400  | -4.22713100 | 0.23306200  |
| C | 1.16042400  | -3.96086000 | -1.15563800 |
| C | -0.03067300 | -3.63685700 | -1.94009400 |
| C | -0.04529600 | -2.71027800 | -3.04493600 |
| C | -1.26572200 | -2.02059800 | -3.35278700 |
| C | -1.23812700 | -0.67306000 | -3.85308100 |
| C | -2.38811200 | 0.01956000  | -3.33271200 |
| C | -2.33619800 | 1.40866200  | -3.03043300 |
| C | -3.14301300 | 1.85425500  | -1.92096600 |
| C | -2.63380600 | 2.90101700  | -1.07609300 |
| C | -3.12361200 | 2.67114200  | 0.25464300  |
| C | -1.06450200 | 3.76465500  | 1.10073500  |
| C | -0.61383000 | 4.06456300  | -0.22994800 |
| C | -1.38411900 | 3.57207400  | -1.34361900 |
| C | -0.66192400 | 3.19740600  | -2.50575500 |
| C | -1.12946600 | 2.12208500  | -3.33879300 |
| C | 0.02305400  | 1.42650300  | -3.84526100 |
| C | -0.00079000 | 0.01374300  | -4.07100600 |
| C | 1.21099000  | -0.71518800 | -3.85195800 |
| C | 1.18460300  | -2.05921400 | -3.33954200 |
| C | 2.36224700  | -2.27372100 | -2.51333000 |
| C | 2.40755100  | -3.22560400 | -1.42138400 |
| C | 3.21846000  | -2.82910100 | -0.25717400 |
| C | 2.75205200  | -3.09021200 | 1.13206000  |
| C | 3.10858700  | -1.91151400 | 1.92164600  |
| C | 2.33263500  | -1.41393600 | 3.03121900  |
| C | 2.39495700  | -0.01511500 | 3.34699700  |
| C | 1.23747100  | 0.67232800  | 3.85281200  |
| C | 1.25712400  | 2.01680000  | 3.34001200  |
| C | 0.05012700  | 2.70992300  | 3.04538000  |
| C | 0.09581100  | 3.63632900  | 1.94108000  |
| C | 1.29660900  | 3.91934900  | 1.15574800  |
| C | 0.84160500  | 4.20179800  | -0.23280900 |
| C | 1.59485100  | 3.70708900  | -1.39853400 |
| C | 0.79459600  | 3.19559600  | -2.49432500 |
| C | 1.19939700  | 2.07348100  | -3.32672000 |

|    |             |             |             |
|----|-------------|-------------|-------------|
| C  | 2.37837000  | 1.33282400  | -3.03355500 |
| C  | 2.39195700  | -0.06799000 | -3.34835200 |
| C  | 3.09223400  | -1.01367000 | -2.52157900 |
| C  | 3.78132700  | -0.58118400 | -1.35950800 |
| C  | 3.82637900  | -1.49982900 | -0.25027700 |
| C  | 3.79604000  | -0.96615200 | 1.08328400  |
| C  | 3.80056200  | 0.45094600  | 1.35786800  |
| C  | 3.12734300  | 0.90648800  | 2.52065000  |
| C  | 2.44039000  | 2.19067900  | 2.51246300  |
| C  | 2.51742700  | 3.14045200  | 1.42037500  |
| C  | 3.31284400  | 2.71603100  | 0.25544500  |
| C  | 2.85536200  | 2.99333900  | -1.13362700 |
| C  | 3.17112900  | 1.80330000  | -1.92374200 |
| C  | 3.82587600  | 0.83497700  | -1.08536800 |
| C  | 3.87555600  | 1.36727200  | 0.24825200  |
| C  | -3.12529200 | 1.00424200  | 2.50972700  |
| C  | -2.38476100 | 0.06221400  | 3.33413600  |
| C  | -2.38080000 | -1.32816200 | 3.03274900  |
| C  | -1.19869700 | -2.08292600 | 3.34050600  |
| C  | -0.76979000 | -3.17303500 | 2.50659400  |
| C  | -1.50585100 | -3.52284700 | 1.34547700  |
| C  | -0.75304300 | -4.04030600 | 0.23136100  |
| C  | -1.19377800 | -3.72484100 | -1.09885000 |
| C  | -2.39930200 | -2.97725200 | -1.36572500 |
| C  | -2.43294500 | -2.15870700 | -2.52381500 |
| C  | -3.15958600 | -0.89639800 | -2.50705500 |
| C  | -4.00518800 | -0.46520200 | -1.41108500 |
| C  | -4.01776600 | 0.98169200  | -1.13799600 |
| C  | -4.01073300 | 1.50936600  | 0.25366400  |
| C  | -3.98482100 | 0.60200400  | 1.41398400  |
| C  | -4.04843600 | -0.84350800 | 1.14142300  |
| C  | -3.20357000 | -1.74546900 | 1.92389900  |
| C  | -2.73203000 | -2.80943800 | 1.07871700  |
| C  | -3.21414200 | -2.56240800 | -0.25195900 |
| C  | -4.06156400 | -1.37118800 | -0.25043600 |
| Nd | 1.03387400  | 1.72067200  | -0.00081900 |
| Nd | -2.00973700 | 0.03238300  | -0.00071000 |
| Nd | 0.97820600  | -1.75226900 | -0.00065400 |

Gd<sub>3</sub>@C<sub>80</sub><sup>+</sup> PBE/6-31G\*~MWB53

|   |             |             |            |
|---|-------------|-------------|------------|
| C | -0.14491400 | -2.88286600 | 2.88993100 |
| C | 1.07294900  | -2.24727300 | 3.26156900 |
| C | 1.08117800  | -0.93681600 | 3.85382800 |

|   |             |             |             |
|---|-------------|-------------|-------------|
| C | 2.27402500  | -0.26096200 | 3.42164600  |
| C | 2.26530300  | 1.15262400  | 3.18698000  |
| C | 3.08266600  | 1.67908600  | 2.12307900  |
| C | 2.78831100  | 2.90374900  | 1.39059500  |
| C | 3.31562800  | 2.73786400  | 0.01175100  |
| C | 2.56748900  | 3.23422900  | -1.16000700 |
| C | 2.51623900  | 2.33989000  | -2.30422900 |
| C | 1.35971100  | 2.21206400  | -3.17953500 |
| C | 1.35728400  | 0.89927200  | -3.76719200 |
| C | 0.12855000  | 0.22599200  | -4.06938300 |
| C | 0.09862700  | -1.19783400 | -3.92552300 |
| C | -1.09269500 | -1.88343400 | -3.50236100 |
| C | -0.68969700 | -3.01800400 | -2.71458000 |
| C | -1.45435100 | -3.43358900 | -1.59616200 |
| C | -0.74030400 | -4.01347100 | -0.48669900 |
| C | -1.22210300 | -3.77551700 | 0.84584400  |
| C | -0.09061300 | -3.74171800 | 1.73037300  |
| C | -1.37462800 | -2.21343700 | 3.19850600  |
| C | -2.51083100 | -2.30008300 | 2.32129700  |
| C | -2.43663000 | -3.04442200 | 1.11784800  |
| C | -3.20447100 | -2.56668300 | 0.00296800  |
| C | -2.68688400 | -2.73716400 | -1.32487900 |
| C | -3.12195100 | -1.62304600 | -2.11988200 |
| C | -2.27959500 | -1.14647800 | -3.18362900 |
| C | -2.27645000 | 0.26007300  | -3.40418500 |
| C | -1.09117300 | 0.94166200  | -3.85057100 |
| C | -1.09135600 | 2.26129500  | -3.27711700 |
| C | 0.13869500  | 2.88538800  | -2.88622500 |
| C | 0.14582300  | 3.73884700  | -1.72717000 |
| C | 1.32074500  | 3.96012600  | -0.88453600 |
| C | 0.81221500  | 4.12873300  | 0.49816100  |
| C | 1.51270800  | 3.56912700  | 1.64838000  |
| C | 0.69331100  | 3.03096900  | 2.70575200  |
| C | 1.07647000  | 1.87268300  | 3.48827300  |
| C | -0.11375500 | 1.19964600  | 3.93564400  |
| C | -0.14027600 | -0.22317300 | 4.07679000  |
| C | -1.36719700 | -0.89749000 | 3.78078800  |
| C | -2.49748600 | -0.17458800 | 3.26242200  |
| C | -3.23323400 | -1.03743100 | 2.35489800  |
| C | -4.03255100 | -0.54023000 | 1.25565800  |
| C | -4.02728900 | -1.36394900 | 0.04641600  |
| C | -3.96936200 | -0.76070200 | -1.30524400 |
| C | -3.91878600 | 0.68738700  | -1.49737100 |
| C | -3.03686000 | 1.15063100  | -2.54657100 |

|    |             |             |             |
|----|-------------|-------------|-------------|
| C  | -2.27719900 | 2.38850800  | -2.47185600 |
| C  | -2.25700700 | 3.12956600  | -1.26475600 |
| C  | -1.03896800 | 3.81654100  | -0.91727900 |
| C  | -0.63552700 | 4.02242500  | 0.44452200  |
| C  | -1.43441800 | 3.48241200  | 1.50883200  |
| C  | -0.75714900 | 3.04430900  | 2.67311400  |
| C  | -1.25021900 | 1.92450900  | 3.43148200  |
| C  | -2.44119800 | 1.23138700  | 3.04326600  |
| C  | -3.20850000 | 1.73933500  | 1.92967100  |
| C  | -4.05803900 | 0.91729700  | 1.06830400  |
| C  | -4.00320200 | 1.52267600  | -0.29061800 |
| C  | -3.11666300 | 2.67961800  | -0.19761500 |
| C  | -2.67227600 | 2.82859800  | 1.16097300  |
| C  | 2.27220400  | -2.41065900 | 2.45712500  |
| C  | 3.00165100  | -1.15496600 | 2.56191900  |
| C  | 3.72420700  | -0.65853000 | 1.44843100  |
| C  | 3.77605100  | 0.77119400  | 1.25476800  |
| C  | 3.88194000  | 1.38630200  | -0.04052500 |
| C  | 3.83261700  | 0.53414200  | -1.20314700 |
| C  | 3.20191400  | 1.05326800  | -2.36242300 |
| C  | 2.49853100  | 0.18309600  | -3.26634300 |
| C  | 2.42492600  | -1.23054800 | -3.03229600 |
| C  | 1.23385100  | -1.91256200 | -3.40670500 |
| C  | 0.76264500  | -3.06069500 | -2.65292800 |
| C  | 1.49957600  | -3.65054000 | -1.55814300 |
| C  | 0.70668300  | -4.20225900 | -0.45061200 |
| C  | 1.12519700  | -4.02599300 | 0.96728300  |
| C  | 2.35339300  | -3.29582400 | 1.31460700  |
| C  | 3.17889800  | -2.81750600 | 0.20143900  |
| C  | 3.80463800  | -1.50382200 | 0.29042900  |
| C  | 3.81817000  | -0.89570500 | -1.00966200 |
| C  | 3.15291400  | -1.78280600 | -1.92273700 |
| C  | 2.75683600  | -2.99071100 | -1.20887800 |
| Gd | -2.01751000 | 0.11996500  | -0.01125300 |
| Gd | 0.91747000  | -1.79876600 | -0.00940600 |
| Gd | 1.13576200  | 1.66820400  | 0.00228600  |

Tb<sub>3</sub>@C<sub>80</sub><sup>+</sup> PBE/6-31G\*~MWB54

|   |            |             |             |
|---|------------|-------------|-------------|
| C | 2.17037200 | -3.15387200 | -1.33525400 |
| C | 2.27325100 | -2.35540700 | -2.50107700 |
| C | 3.08827100 | -1.15046800 | -2.48401400 |
| C | 2.40159000 | -0.18619200 | -3.32582000 |
| C | 2.45521600 | 1.20570900  | -3.03240500 |

|   |             |             |             |
|---|-------------|-------------|-------------|
| C | 1.31355500  | 2.00802300  | -3.35676200 |
| C | 0.92501600  | 3.11775200  | -2.52781700 |
| C | -0.52569500 | 3.21998800  | -2.52281200 |
| C | -1.28466900 | 3.78611400  | -1.42969700 |
| C | -2.58943000 | 3.17602300  | -1.16735500 |
| C | -3.07530200 | 2.94700400  | 0.21635300  |
| C | -3.74922200 | 1.65406100  | 0.21302700  |
| C | -3.75440200 | 0.74974200  | 1.33097400  |
| C | -3.85488100 | -0.66347100 | 1.06197500  |
| C | -3.24544700 | -1.64800100 | 1.91137500  |
| C | -2.96965600 | -2.84890700 | 1.12820000  |
| C | -1.74753000 | -3.60694900 | 1.40823100  |
| C | -1.01510400 | -4.13251800 | 0.25268900  |
| C | 0.44130000  | -4.07110600 | 0.26037900  |
| C | 0.91084500  | -3.80256100 | -1.06950400 |
| C | 2.99872600  | -2.79604800 | -0.21513800 |
| C | 2.49394300  | -2.99561600 | 1.11418300  |
| C | 1.21788800  | -3.61218200 | 1.37978700  |
| C | 0.51079000  | -3.20322500 | 2.53719200  |
| C | -0.94172500 | -3.13303400 | 2.51168000  |
| C | -1.30644500 | -1.99675400 | 3.33881300  |
| C | -2.45117900 | -1.20941000 | 3.03069600  |
| C | -2.41139000 | 0.18884300  | 3.34066400  |
| C | -3.06253900 | 1.15622400  | 2.49839900  |
| C | -2.27489800 | 2.37940400  | 2.48508200  |
| C | -2.26866600 | 3.31741800  | 1.38394200  |
| C | -0.99604600 | 3.99464500  | 1.12121600  |
| C | -0.51315200 | 4.22746300  | -0.26355600 |
| C | 0.92526900  | 3.98986600  | -0.25065500 |
| C | 1.65829600  | 3.44038200  | -1.35958900 |
| C | 2.84749900  | 2.67647400  | -1.07618300 |
| C | 3.27534200  | 1.59017600  | -1.91205300 |
| C | 4.06570900  | 0.65697600  | -1.11433600 |
| C | 3.94747700  | -0.77881300 | -1.38084400 |
| C | 3.92404700  | -1.66872900 | -0.21464700 |
| C | 3.94060700  | -1.13463000 | 1.17077100  |
| C | 3.03417600  | -1.96607500 | 1.95660700  |
| C | 2.24984100  | -1.48579400 | 3.06553200  |
| C | 1.01618800  | -2.14688700 | 3.37263200  |
| C | -0.10927200 | -1.39936100 | 3.86638000  |
| C | -0.02840000 | 0.01313900  | 4.08355700  |
| C | -1.20836900 | 0.78955800  | 3.85203500  |
| C | -1.11971100 | 2.12574000  | 3.32773400  |
| C | 0.13909400  | 2.72371400  | 3.03749700  |

|    |             |             |             |
|----|-------------|-------------|-------------|
| C  | 0.17164900  | 3.63213500  | 1.91951500  |
| C  | 1.34021900  | 3.66842700  | 1.08572900  |
| C  | 2.50988400  | 2.87459200  | 1.36896300  |
| C  | 3.30418000  | 2.41897200  | 0.26016000  |
| C  | 4.08641300  | 1.18924000  | 0.27147400  |
| C  | 3.98451300  | 0.30474000  | 1.43556000  |
| C  | 3.16479300  | 0.77766800  | 2.52878700  |
| C  | 2.35734800  | -0.09734800 | 3.35954000  |
| C  | 1.23741900  | 0.64677600  | 3.87019400  |
| C  | 1.32611200  | 1.98987100  | 3.36262300  |
| C  | 2.50025700  | 2.07097100  | 2.53532000  |
| C  | 1.12899000  | -2.13526100 | -3.34434400 |
| C  | 1.20817400  | -0.79187400 | -3.85236500 |
| C  | 0.02969300  | -0.01280300 | -4.08348400 |
| C  | 0.11410900  | 1.39962800  | -3.86784100 |
| C  | -1.01119900 | 2.13543100  | -3.35704600 |
| C  | -2.24564500 | 1.48948500  | -3.06598400 |
| C  | -2.99665000 | 2.01796600  | -1.95632600 |
| C  | -3.73192600 | 1.11432900  | -1.11721600 |
| C  | -3.79668600 | -0.30031000 | -1.38634300 |
| C  | -3.91634100 | -1.19866400 | -0.26913500 |
| C  | -3.40359400 | -2.56390500 | -0.26331900 |
| C  | -2.62584000 | -3.02408000 | -1.41906000 |
| C  | -1.44554000 | -3.84373700 | -1.13792200 |
| C  | -0.23256700 | -3.62671600 | -1.91987300 |
| C  | -0.14124800 | -2.72355500 | -3.03825600 |
| C  | -1.31587000 | -1.98077700 | -3.34636800 |
| C  | -1.23735600 | -0.64365500 | -3.87089500 |
| C  | -2.36749800 | 0.09605900  | -3.37613300 |
| C  | -3.14100200 | -0.78630800 | -2.54409900 |
| C  | -2.50476100 | -2.09402600 | -2.52020500 |
| Tb | 2.02169800  | -0.12931200 | 0.00167200  |
| Tb | -1.12629400 | -1.68196100 | 0.00058200  |
| Tb | -0.90197700 | 1.81203900  | -0.00038300 |

Dy<sub>3</sub>@C<sub>80</sub><sup>+</sup> PBE/6-31G\*~MWB55

|   |             |            |            |
|---|-------------|------------|------------|
| C | -3.25538500 | 0.52074800 | 2.36253300 |
| C | -2.30384600 | 0.46129300 | 3.40770500 |
| C | -1.36332700 | 1.53985800 | 3.59561200 |
| C | -0.11427000 | 0.95841700 | 4.01913200 |
| C | 1.13312900  | 1.53199800 | 3.63962400 |
| C | 2.23565200  | 0.63948800 | 3.41698100 |
| C | 3.23384700  | 0.91572600 | 2.42063700 |



|   |             |             |             |
|---|-------------|-------------|-------------|
| C | 3.71906000  | -0.34850500 | 1.86750500  |
| C | 4.26969300  | -0.48636100 | 0.52547300  |
| C | 3.89001000  | -1.73177700 | -0.15848700 |
| C | 3.46852800  | -1.74831200 | -1.57507300 |
| C | 2.45234400  | -2.76425600 | -1.73376100 |
| C | 1.39179700  | -2.67019100 | -2.69439800 |
| C | 0.13245400  | -3.27995400 | -2.35542200 |
| C | -1.11345100 | -2.72972500 | -2.80221500 |
| C | -2.15178000 | -3.10122100 | -1.85971500 |
| C | -3.20309800 | -2.13678200 | -1.58345100 |
| C | -3.66756600 | -2.05105300 | -0.21085300 |
| C | -3.99630800 | -0.74389300 | 0.32600700  |
| C | -3.61453800 | -0.70677900 | 1.70771200  |
| C | -3.32104800 | 1.72778500  | 1.57912800  |
| C | -3.70039200 | 1.70759600  | 0.19521400  |
| C | -4.00705500 | 0.45930300  | -0.46240300 |
| C | -3.65851300 | 0.34105000  | -1.82859500 |
| C | -3.22781000 | -0.92954500 | -2.37155000 |
| C | -2.23371100 | -0.63782300 | -3.37867100 |
| C | -1.13166900 | -1.51896200 | -3.58455300 |
| C | 0.12153100  | -0.95732600 | -3.97728800 |
| C | 1.36907500  | -1.53066900 | -3.53728900 |
| C | 2.32575600  | -0.46292200 | -3.34533300 |
| C | 3.36733400  | -0.53479200 | -2.35739600 |
| C | 3.78270500  | 0.69762300  | -1.71076900 |
| C | 4.22367100  | 0.73957500  | -0.29588200 |
| C | 3.64119600  | 1.96902700  | 0.25799800  |
| C | 3.14424300  | 2.08381400  | 1.60682900  |
| C | 2.09065500  | 3.02296700  | 1.87860500  |
| C | 1.09985300  | 2.74950500  | 2.88661500  |
| C | -0.14301300 | 3.33376700  | 2.46165400  |
| C | -1.39016000 | 2.70889600  | 2.77306200  |
| C | -2.45215200 | 2.85570400  | 1.79736400  |
| C | -2.31582800 | 3.61074600  | 0.54072200  |
| C | -3.09494400 | 2.84738900  | -0.46973900 |
| C | -2.61959300 | 2.64455400  | -1.83268100 |
| C | -2.94588000 | 1.40763400  | -2.49588500 |
| C | -2.06187000 | 0.78849700  | -3.45509800 |
| C | -0.78325500 | 1.35378300  | -3.73962400 |
| C | 0.29348600  | 0.46944800  | -4.05398700 |
| C | 1.64515200  | 0.77415000  | -3.65937700 |
| C | 1.95066800  | 1.96134900  | -2.94624400 |
| C | 3.01587300  | 1.89610100  | -1.98261000 |
| C | 2.94886000  | 2.68066000  | -0.78458500 |

|    |             |             |             |
|----|-------------|-------------|-------------|
| C  | 1.84611300  | 3.57342900  | -0.52236800 |
| C  | 1.45755500  | 3.77435300  | 0.82937600  |
| C  | 0.05811600  | 3.99549600  | 1.17625300  |
| C  | -0.99834900 | 4.18647700  | 0.19118000  |
| C  | -0.56181000 | 4.00612800  | -1.19652200 |
| C  | -1.36646400 | 3.26817500  | -2.18447000 |
| C  | -0.46366400 | 2.59769100  | -3.09473300 |
| C  | 0.88285800  | 2.89079200  | -2.69886600 |
| C  | 0.83315200  | 3.71679400  | -1.52392900 |
| C  | -1.64376100 | -0.78127300 | 3.72512200  |
| C  | -0.28709400 | -0.47145600 | 4.09504700  |
| C  | 0.78255900  | -1.36234800 | 3.79072300  |
| C  | 2.06179200  | -0.78470600 | 3.48893800  |
| C  | 2.95291700  | -1.39385400 | 2.54132300  |
| C  | 2.57643900  | -2.58953100 | 1.85857600  |
| C  | 3.05633700  | -2.73220000 | 0.51183700  |
| C  | 2.21536900  | -3.37932000 | -0.45902800 |
| C  | 0.93914600  | -3.95270300 | -0.11456600 |
| C  | -0.10010200 | -3.96149900 | -1.11015100 |
| C  | -1.52964700 | -3.91550600 | -0.78828500 |
| C  | -1.95733900 | -3.79283400 | 0.61784900  |
| C  | -3.06109400 | -2.85271900 | 0.87829300  |
| C  | -3.01085300 | -1.96722600 | 2.04340900  |
| C  | -1.94937100 | -1.98547400 | 3.01951900  |
| C  | -0.89647600 | -2.92349900 | 2.79407300  |
| C  | 0.45303900  | -2.61307200 | 3.17458600  |
| C  | 1.34022100  | -3.22419500 | 2.22024200  |
| C  | 0.53494300  | -3.90907200 | 1.24604900  |
| C  | -0.87466800 | -3.74705900 | 1.59035300  |
| Dy | -0.87311200 | 1.82205600  | -0.04220300 |
| Dy | -1.17241100 | -1.65073800 | -0.04368500 |
| Dy | 2.01225300  | -0.17108100 | -0.10711200 |

Ho<sub>3</sub>@C<sub>80</sub><sup>+</sup> PBE/6-31G\*~MWB56

|   |             |             |            |
|---|-------------|-------------|------------|
| C | 2.46595500  | 2.91359500  | 1.36669200 |
| C | 1.66619800  | 2.78911800  | 2.52944200 |
| C | 1.75572400  | 1.62061200  | 3.36416400 |
| C | 0.43856900  | 1.33737600  | 3.87023200 |
| C | -0.00281200 | -0.00647700 | 4.08818700 |
| C | -1.38683500 | -0.29572400 | 3.86626300 |
| C | -1.79599900 | -1.57041600 | 3.34188700 |
| C | -2.96630200 | -1.38024700 | 2.50514800 |
| C | -3.30218300 | -2.24867000 | 1.40089000 |

|   |             |             |             |
|---|-------------|-------------|-------------|
| C | -3.91596800 | -1.60643500 | 0.24087100  |
| C | -3.56378200 | -1.99711000 | -1.14264100 |
| C | -3.53691600 | -0.77364000 | -1.93392500 |
| C | -2.65668000 | -0.55844500 | -3.05079100 |
| C | -2.26342000 | 0.78252700  | -3.36427300 |
| C | -0.94327900 | 1.05764600  | -3.86619200 |
| C | -0.52295400 | 2.32871600  | -3.34187900 |
| C | 0.84457900  | 2.58885000  | -3.04346400 |
| C | 1.09865400  | 3.45597400  | -1.92463300 |
| C | 2.23524300  | 3.20524500  | -1.08359700 |
| C | 1.90436500  | 3.61926500  | 0.25027800  |
| C | 3.42373800  | 1.87174600  | 1.09188600  |
| C | 3.81291000  | 1.50328300  | -0.24099600 |
| C | 3.16698300  | 2.14207000  | -1.35818000 |
| C | 2.95933700  | 1.36365100  | -2.52343200 |
| C | 1.80949700  | 1.57865900  | -3.36055700 |
| C | 1.38674700  | 0.29951700  | -3.86501900 |
| C | 0.00310100  | 0.00648800  | -4.08721600 |
| C | -0.43452200 | -1.33936500 | -3.86994100 |
| C | -1.74710300 | -1.61209200 | -3.34942300 |
| C | -1.68494400 | -2.79883600 | -2.51577600 |
| C | -2.58922800 | -3.04983100 | -1.41622900 |
| C | -2.03036800 | -3.75012700 | -0.25469200 |
| C | -2.38051000 | -3.35346600 | 1.13320800  |
| C | -1.15644500 | -3.44208100 | 1.92267400  |
| C | -0.84712900 | -2.58853500 | 3.04316500  |
| C | 0.52725500  | -2.34066200 | 3.35744700  |
| C | 0.94037300  | -1.06000500 | 3.86733000  |
| C | 2.25018200  | -0.77651000 | 3.34611500  |
| C | 2.65804300  | 0.55470200  | 3.04997900  |
| C | 3.55453600  | 0.71515000  | 1.93198800  |
| C | 4.09205000  | -0.38788200 | 1.14198600  |
| C | 4.26478100  | 0.11607700  | -0.24410400 |
| C | 3.94029700  | -0.71617700 | -1.40826300 |
| C | 3.27303900  | -0.05621900 | -2.50809700 |
| C | 2.27772000  | -0.70178300 | -3.34439600 |
| C | 1.81943100  | -2.01760100 | -3.05065200 |
| C | 0.46214900  | -2.34635800 | -3.36819000 |
| C | -0.29854800 | -3.23693200 | -2.53310600 |
| C | 0.27217000  | -3.80929600 | -1.36945700 |
| C | -0.60348700 | -4.05234800 | -0.25280700 |
| C | -0.09001300 | -3.90441200 | 1.08070600  |
| C | 1.29049000  | -3.59636000 | 1.35582300  |
| C | 1.58320500  | -2.84517500 | 2.52079800  |

|    |             |             |             |
|----|-------------|-------------|-------------|
| C  | 2.67210300  | -1.88371000 | 2.50802000  |
| C  | 3.59410800  | -1.73860700 | 1.40592100  |
| C  | 3.34760500  | -2.58914100 | 0.24400600  |
| C  | 3.51417100  | -2.08684900 | -1.13827200 |
| C  | 2.44347100  | -2.67454000 | -1.93357600 |
| C  | 1.65862900  | -3.53571200 | -1.09461500 |
| C  | 2.18231100  | -3.46002700 | 0.23954200  |
| C  | 0.28895800  | 3.25137700  | 2.51438500  |
| C  | -0.46067900 | 2.33072400  | 3.34863200  |
| C  | -1.81701800 | 2.01931100  | 3.04942500  |
| C  | -2.28944000 | 0.70403200  | 3.35982400  |
| C  | -3.25483000 | 0.04372000  | 2.52216800  |
| C  | -3.75941000 | 0.67612100  | 1.35905100  |
| C  | -4.08706200 | -0.16158500 | 0.24057900  |
| C  | -3.89054800 | 0.33398900  | -1.09192900 |
| C  | -3.43558000 | 1.67284700  | -1.36329500 |
| C  | -2.65459600 | 1.88436300  | -2.52655100 |
| C  | -1.58178800 | 2.86599200  | -2.50687800 |
| C  | -1.34703000 | 3.77236500  | -1.40542700 |
| C  | 0.05217300  | 4.08845700  | -1.13115600 |
| C  | 0.56718900  | 4.19277700  | 0.25253600  |
| C  | -0.29534300 | 3.97833400  | 1.41174300  |
| C  | -1.71319700 | 3.73436400  | 1.14382300  |
| C  | -2.40189000 | 2.71688500  | 1.93087000  |
| C  | -3.33591800 | 2.02683800  | 1.08752700  |
| C  | -3.20877700 | 2.55016600  | -0.24447800 |
| C  | -2.23294300 | 3.63438000  | -0.24400200 |
| Ho | 1.95134400  | -0.55966700 | 0.00271400  |
| Ho | -0.48959800 | 1.96869600  | 0.00180300  |
| Ho | -1.46287100 | -1.40705100 | 0.00147300  |

Er<sub>3</sub>@C<sub>80</sub><sup>+</sup> PBE/6-31G\*~MWB57

|   |             |             |             |
|---|-------------|-------------|-------------|
| C | 2.80963400  | -2.61352300 | 1.31423300  |
| C | 2.73593000  | -1.81259000 | 2.48117100  |
| C | 1.57585800  | -1.85067500 | 3.33170600  |
| C | 1.36312700  | -0.52545500 | 3.85206300  |
| C | 0.04519700  | -0.02040700 | 4.08972400  |
| C | -0.17824800 | 1.37686500  | 3.87815300  |
| C | -1.43775900 | 1.84913200  | 3.37078900  |
| C | -1.19975700 | 3.01088300  | 2.53685500  |
| C | -2.05746700 | 3.37838900  | 1.43802900  |
| C | -1.39892900 | 3.95668200  | 0.27858700  |
| C | -1.82665200 | 3.64003600  | -1.09639200 |

|   |             |             |             |
|---|-------------|-------------|-------------|
| C | -0.62054800 | 3.58071400  | -1.90917800 |
| C | -0.46582600 | 2.70014900  | -3.03200200 |
| C | 0.84958300  | 2.24444200  | -3.36618300 |
| C | 1.05384300  | 0.91430000  | -3.87520900 |
| C | 2.30996900  | 0.43058900  | -3.37013200 |
| C | 2.50647600  | -0.95054400 | -3.08291000 |
| C | 3.36831500  | -1.25460400 | -1.97676200 |
| C | 3.08275800  | -2.38637600 | -1.14028900 |
| C | 3.52186900  | -2.08178300 | 0.19159100  |
| C | 1.71926800  | -3.51912400 | 1.04798300  |
| C | 1.31798300  | -3.88929500 | -0.28292300 |
| C | 1.97338000  | -3.26228800 | -1.40554100 |
| C | 1.18903700  | -3.00466300 | -2.55810700 |
| C | 1.44769500  | -1.86311500 | -3.39379300 |
| C | 0.18330000  | -1.37621800 | -3.87737900 |
| C | -0.04489100 | 0.02157200  | -4.08877000 |
| C | -1.36496500 | 0.52321700  | -3.85026700 |
| C | -1.56765600 | 1.84422800  | -3.32017700 |
| C | -2.74567800 | 1.83336300  | -2.47215300 |
| C | -2.94366800 | 2.74354100  | -1.36595100 |
| C | -3.66978500 | 2.21950500  | -0.19865500 |
| C | -3.22626900 | 2.53433000  | 1.18561800  |
| C | -3.35836800 | 1.31089300  | 1.96955100  |
| C | -2.50596400 | 0.95457000  | 3.08004900  |
| C | -2.32067200 | -0.43153100 | 3.38254100  |
| C | -1.05598200 | -0.90910300 | 3.87753100  |
| C | -0.84113400 | -2.22683200 | 3.34381300  |
| C | 0.46409300  | -2.69859600 | 3.02783700  |
| C | 0.56807000  | -3.59807100 | 1.90228200  |
| C | -0.56773400 | -4.08387300 | 1.12457900  |
| C | -0.08930900 | -4.28099200 | -0.27012500 |
| C | -0.91909400 | -3.89088300 | -1.41997500 |
| C | -0.24416400 | -3.24887000 | -2.52486800 |
| C | -0.85313600 | -2.22092400 | -3.34832500 |
| C | -2.14125400 | -1.69994600 | -3.03525500 |
| C | -2.40872900 | -0.32730900 | -3.34338900 |
| C | -3.25099200 | 0.46920500  | -2.49210400 |
| C | -3.84063800 | -0.07892200 | -1.32493900 |
| C | -4.03456300 | 0.80441200  | -0.20032900 |
| C | -3.88509300 | 0.27381600  | 1.12863900  |
| C | -3.64039700 | -1.12280600 | 1.39323100  |
| C | -2.88515900 | -1.45659000 | 2.54517100  |
| C | -1.97633900 | -2.58767900 | 2.51667400  |
| C | -1.88156800 | -3.49923000 | 1.40336900  |

|    |             |             |             |
|----|-------------|-------------|-------------|
| C  | -2.72468100 | -3.19492700 | 0.25769100  |
| C  | -2.25145200 | -3.37980500 | -1.12627500 |
| C  | -2.81271200 | -2.29288500 | -1.91401600 |
| C  | -3.63282700 | -1.47755200 | -1.06194300 |
| C  | -3.55940500 | -2.00750800 | 0.27013300  |
| C  | 3.26086800  | -0.45948300 | 2.46917800  |
| C  | 2.39067600  | 0.32839000  | 3.32107300  |
| C  | 2.14387600  | 1.70019200  | 3.03242500  |
| C  | 0.85717900  | 2.23242200  | 3.36013100  |
| C  | 0.23386200  | 3.23273500  | 2.53452200  |
| C  | 0.87638400  | 3.71701300  | 1.36811000  |
| C  | 0.04642900  | 4.08642700  | 0.26095400  |
| C  | 0.51341800  | 3.88409900  | -1.08103300 |
| C  | 1.82314200  | 3.36486100  | -1.37042100 |
| C  | 1.97803300  | 2.57735300  | -2.53894300 |
| C  | 2.90529500  | 1.45762400  | -2.53592700 |
| C  | 3.80993300  | 1.17417000  | -1.44553900 |
| C  | 4.03804100  | -0.23945000 | -1.17930300 |
| C  | 4.13347900  | -0.76520500 | 0.19452100  |
| C  | 3.99284200  | 0.09729900  | 1.35776300  |
| C  | 3.83874700  | 1.53249900  | 1.10562400  |
| C  | 2.85854000  | 2.25981000  | 1.90794600  |
| C  | 2.20222800  | 3.22990900  | 1.07741900  |
| C  | 2.70681500  | 3.09018100  | -0.26252100 |
| C  | 3.74998700  | 2.06767000  | -0.27965500 |
| Er | -0.54361800 | -1.95643300 | 0.00513400  |
| Er | 1.96881700  | 0.50625000  | 0.00537000  |
| Er | -1.42658400 | 1.44507900  | 0.00788400  |

Tm<sub>3</sub>@C<sub>80</sub><sup>+</sup> PBE/6-31G\*~MWB58

|   |             |             |             |
|---|-------------|-------------|-------------|
| C | 3.67620500  | 1.04523600  | 1.36219600  |
| C | 2.93168600  | 1.41654700  | 2.51047000  |
| C | 2.34294000  | 0.42071700  | 3.36605600  |
| C | 1.09511200  | 0.94003400  | 3.86206500  |
| C | -0.02877000 | 0.08459700  | 4.09321800  |
| C | -1.33290200 | 0.62166500  | 3.85314400  |
| C | -2.38440500 | -0.21262900 | 3.33843000  |
| C | -3.23375200 | 0.58534900  | 2.47692300  |
| C | -3.97078900 | 0.02941800  | 1.37113600  |
| C | -4.09100800 | 0.87529000  | 0.19895000  |
| C | -4.02155900 | 0.32711000  | -1.16340500 |
| C | -3.34164600 | 1.31635600  | -1.98355000 |
| C | -2.49535600 | 0.97042100  | -3.08794000 |

|   |             |             |             |
|---|-------------|-------------|-------------|
| C | -1.41416900 | 1.84886900  | -3.41840300 |
| C | -0.16436600 | 1.31940500  | -3.89568400 |
| C | 0.89656200  | 2.14401500  | -3.38403400 |
| C | 2.17184600  | 1.59373100  | -3.06818000 |
| C | 2.86401000  | 2.18175500  | -1.95980800 |
| C | 3.67211900  | 1.36218000  | -1.09934000 |
| C | 3.61408900  | 1.91171100  | 0.22597700  |
| C | 3.88441000  | -0.36119000 | 1.11843700  |
| C | 4.02184500  | -0.91845600 | -0.20249900 |
| C | 3.84096200  | -0.04518800 | -1.34029700 |
| C | 3.22574400  | -0.59472300 | -2.49490600 |
| C | 2.40039200  | 0.20966800  | -3.35513000 |
| C | 1.33191600  | -0.62024900 | -3.84278700 |
| C | 0.02479500  | -0.08702400 | -4.08522200 |
| C | -1.09722400 | -0.94644900 | -3.85471200 |
| C | -2.33746300 | -0.42084500 | -3.35286500 |
| C | -2.95510400 | -1.41869400 | -2.49976000 |
| C | -3.84777800 | -1.09575900 | -1.41033400 |
| C | -3.81319800 | -1.97624100 | -0.23121600 |
| C | -3.87084500 | -1.41329100 | 1.14364400  |
| C | -2.90873600 | -2.15340000 | 1.95403400  |
| C | -2.17593000 | -1.59505000 | 3.06840000  |
| C | -0.90349800 | -2.15587700 | 3.39801500  |
| C | 0.15603700  | -1.32085300 | 3.90070400  |
| C | 1.39968400  | -1.83399100 | 3.39503700  |
| C | 2.49018600  | -0.97392000 | 3.08536900  |
| C | 3.32879800  | -1.36903200 | 1.97627400  |
| C | 3.16128600  | -2.59920000 | 1.21152700  |
| C | 3.61737200  | -2.32520100 | -0.17662500 |
| C | 2.86453500  | -2.84266800 | -1.33272700 |
| C | 2.68442400  | -1.94449800 | -2.45185500 |
| C | 1.50236100  | -1.93804700 | -3.29421200 |
| C | 0.37814400  | -2.75882600 | -2.98921800 |
| C | -0.92603300 | -2.27452000 | -3.32818800 |
| C | -2.05828100 | -2.56302500 | -2.48928700 |
| C | -1.92196300 | -3.33948300 | -1.31034100 |
| C | -2.79649900 | -3.02761600 | -0.20273300 |
| C | -2.28625600 | -3.15701800 | 1.13733800  |
| C | -0.97220400 | -3.67388700 | 1.43023200  |
| C | -0.31133200 | -3.18531800 | 2.58509700  |
| C | 1.12573100  | -3.00009900 | 2.58012700  |
| C | 1.96268400  | -3.39479500 | 1.47797700  |
| C | 1.28403100  | -3.96942600 | 0.33399500  |
| C | 1.71635300  | -3.68974100 | -1.04323200 |

|    |             |             |             |
|----|-------------|-------------|-------------|
| C  | 0.51149300  | -3.62605800 | -1.85615300 |
| C  | -0.62698900 | -3.89162400 | -1.01993200 |
| C  | -0.16030700 | -4.07941800 | 0.32466300  |
| C  | 2.05224600  | 2.56925900  | 2.46906100  |
| C  | 0.91257400  | 2.25389300  | 3.30828700  |
| C  | -0.38089800 | 2.75825800  | 2.99179500  |
| C  | -1.51209500 | 1.94398700  | 3.31088000  |
| C  | -2.67623000 | 1.92386400  | 2.46485700  |
| C  | -2.73480800 | 2.70902900  | 1.28584900  |
| C  | -3.46171800 | 2.18071200  | 0.17308400  |
| C  | -3.02627400 | 2.45582400  | -1.16697600 |
| C  | -1.89442700 | 3.29484400  | -1.44872600 |
| C  | -1.12205900 | 2.99527400  | -2.60012400 |
| C  | 0.31704700  | 3.19869300  | -2.57480800 |
| C  | 1.01118200  | 3.83329100  | -1.47915100 |
| C  | 2.32332900  | 3.28304400  | -1.18181600 |
| C  | 2.79719800  | 3.10929000  | 0.19888500  |
| C  | 1.97339800  | 3.46161600  | 1.34066800  |
| C  | 0.67930300  | 4.08984800  | 1.06113200  |
| C  | -0.46590100 | 3.64429200  | 1.85135400  |
| C  | -1.62229700 | 3.58169900  | 1.00196900  |
| C  | -1.21775700 | 3.92318800  | -0.33689100 |
| C  | 0.20029700  | 4.27798900  | -0.33477900 |
| Tm | 1.44603400  | -1.42837800 | 0.00636700  |
| Tm | 0.52949500  | 1.96053000  | -0.00032800 |
| Tm | -1.96522500 | -0.52333700 | 0.00357700  |

Lu<sub>3</sub>@C<sub>80</sub><sup>+</sup> PBE/6-31G\*~MWB60

|   |             |             |             |
|---|-------------|-------------|-------------|
| C | -3.70248800 | 0.19383100  | -1.62220700 |
| C | -2.98431300 | 0.15256000  | -2.83924500 |
| C | -2.31539500 | -1.05814900 | -3.25211400 |
| C | -1.09570800 | -0.67274000 | -3.91701900 |
| C | 0.08123500  | -1.47128600 | -3.81963800 |
| C | 1.34720400  | -0.80211000 | -3.82547300 |
| C | 2.44691100  | -1.30434600 | -3.04804000 |
| C | 3.22758600  | -0.17995300 | -2.56251500 |
| C | 4.02055200  | -0.21962900 | -1.35660600 |
| C | 4.09214100  | 1.02465500  | -0.59225500 |
| C | 4.02321900  | 1.02937100  | 0.88700400  |
| C | 3.23024100  | 2.18476000  | 1.27443300  |
| C | 2.38537000  | 2.22496900  | 2.43665600  |
| C | 1.23036200  | 3.07607900  | 2.40040400  |
| C | 0.02139800  | 2.69712200  | 3.07513800  |



|   |             |             |             |
|---|-------------|-------------|-------------|
| C | -1.09264000 | 3.23076800  | 2.33363900  |
| C | -2.33223200 | 2.51280300  | 2.27235300  |
| C | -3.08794500 | 2.62527400  | 1.03846900  |
| C | -3.74809100 | 1.43317700  | 0.55806700  |
| C | -3.68643400 | 1.42453300  | -0.87593000 |
| C | -3.81867800 | -1.02817900 | -0.87083800 |
| C | -3.87988700 | -1.02332600 | 0.56317700  |
| C | -3.82240200 | 0.20680600  | 1.30930700  |
| C | -3.19959200 | 0.17596500  | 2.57845800  |
| C | -2.44105800 | 1.31158400  | 3.04773700  |
| C | -1.32736400 | 0.79971200  | 3.80758600  |
| C | -0.06654100 | 1.46537700  | 3.80608600  |
| C | 1.11664400  | 0.66816200  | 3.91342700  |
| C | 2.32247500  | 1.04675700  | 3.22732200  |
| C | 3.01205300  | -0.15614100 | 2.80131400  |
| C | 3.87760300  | -0.20501600 | 1.64984900  |
| C | 3.88485100  | -1.44994400 | 0.89197200  |
| C | 3.95314700  | -1.45912000 | -0.58622900 |
| C | 3.07386300  | -2.52784100 | -1.03882600 |
| C | 2.32126800  | -2.48258600 | -2.26269600 |
| C | 1.08651600  | -3.21085800 | -2.32791400 |
| C | -0.01877800 | -2.70492000 | -3.09453300 |
| C | -1.23538800 | -3.10118400 | -2.43796800 |
| C | -2.38897300 | -2.25468000 | -2.47002400 |
| C | -3.24195200 | -2.27901800 | -1.29831800 |
| C | -2.97094600 | -3.11231800 | -0.11092000 |
| C | -3.34893100 | -2.27607800 | 1.04853300  |
| C | -2.58597400 | -2.24033900 | 2.28224100  |
| C | -2.56709200 | -1.03190800 | 3.05368600  |
| C | -1.40476500 | -0.63885500 | 3.81158600  |
| C | -0.22186700 | -1.43559200 | 3.81336800  |
| C | 1.03931200  | -0.76828800 | 3.91516600  |
| C | 2.19775300  | -1.27645400 | 3.23117600  |
| C | 2.13443800  | -2.45909300 | 2.44683000  |
| C | 2.97778100  | -2.51520700 | 1.28514900  |
| C | 2.51667000  | -3.19057300 | 0.10606200  |
| C | 1.24536500  | -3.86443400 | 0.05784600  |
| C | 0.55774600  | -3.90861100 | -1.18921700 |
| C | -0.89961900 | -3.87936800 | -1.24609200 |
| C | -1.74400000 | -3.92938100 | -0.05937100 |
| C | -1.00034400 | -3.88269400 | 1.19564500  |
| C | -1.43080700 | -3.08691900 | 2.34746200  |
| C | -0.26614700 | -2.67297600 | 3.08752800  |
| C | 0.89516800  | -3.18284900 | 2.41533000  |

|    |             |             |             |
|----|-------------|-------------|-------------|
| C  | 0.45775200  | -3.89633100 | 1.24731500  |
| C  | -2.18979600 | 1.28293300  | -3.25696500 |
| C  | -1.01828200 | 0.76638200  | -3.91924700 |
| C  | 0.23705900  | 1.43527300  | -3.82690900 |
| C  | 1.42403300  | 0.63419700  | -3.82887800 |
| C  | 2.57124900  | 1.01927900  | -3.05360200 |
| C  | 2.57265900  | 2.20731300  | -2.27347900 |
| C  | 3.32698100  | 2.17679300  | -1.04946500 |
| C  | 2.84152100  | 2.89887900  | 0.09221500  |
| C  | 1.65073500  | 3.70677900  | 0.04072300  |
| C  | 0.87162900  | 3.82787300  | 1.22990600  |
| C  | -0.57930100 | 3.97061200  | 1.17851000  |
| C  | -1.31345300 | 4.08982900  | -0.07709300 |
| C  | -2.62202100 | 3.41055200  | -0.12510200 |
| C  | -2.97961200 | 2.60482500  | -1.30856600 |
| C  | -2.13424800 | 2.48368400  | -2.47986400 |
| C  | -0.89699900 | 3.20165900  | -2.45164400 |
| C  | 0.26994300  | 2.67567000  | -3.10719600 |
| C  | 1.42300000  | 3.06311300  | -2.34190400 |
| C  | 0.97229000  | 3.81891200  | -1.20664700 |
| C  | -0.47977400 | 3.94389500  | -1.26299500 |
| Lu | -1.15215000 | -1.67872300 | 0.01083400  |
| Lu | -0.97311000 | 1.78669100  | 0.01095500  |
| Lu | 2.05783300  | -0.09642600 | 0.02172100  |
